# Supplementary material for: Marine inspired antiplasmodial thiazinoquinones: synthesis, computational studies and electrochemical assays
Source: Royal Society of Chemistry journal article supplement (doi:10.1039/c5ra09302c), 2015-01-01
Supplement: c5ra09302c1.pdf [file c5ra09302c1.pdf]

## SUPPORTING INFORMATION

|                                                      |     |
|------------------------------------------------------|-----|
| 1. Reagents and general experimental procedure       | S2  |
| 2. <sup>1</sup> H NMR spectrum (DMSO) of <b>17</b>   | S3  |
| 3. <sup>13</sup> C NMR spectrum (DMSO) of <b>17</b>  | S4  |
| 4. COSY spectrum of (DMSO) of <b>17</b>              | S5  |
| 5. HSQC spectrum of (DMSO) of <b>17</b>              | S6  |
| 6. HMBC spectrum of (DMSO) of <b>17</b>              | S7  |
| 7. ESI mass spectrum of <b>17</b>                    | S8  |
| 8. <sup>1</sup> H NMR spectrum (DMSO) of <b>20</b>   | S9  |
| 9. <sup>13</sup> C NMR spectrum (DMSO) of <b>20</b>  | S10 |
| 10. COSY spectrum of (DMSO) of <b>20</b>             | S11 |
| 11. HSQC spectrum of (DMSO) of <b>20</b>             | S12 |
| 12. HMBC spectrum of (DMSO) of <b>20</b>             | S13 |
| 13. ESI mass spectrum of of <b>20</b>                | S14 |
| 14. <sup>1</sup> H NMR spectrum (DMSO) of <b>18</b>  | S15 |
| 15. <sup>13</sup> C NMR spectrum (DMSO) of <b>18</b> | S16 |
| 16. ESI mass spectrum of of <b>18</b>                | S17 |
| 17. <sup>1</sup> H NMR spectrum (DMSO) of <b>21</b>  | S18 |
| 18. <sup>13</sup> C NMR spectrum (DMSO) of <b>21</b> | S19 |
| 19. <sup>1</sup> H ESI mass spectrum of of <b>21</b> | S20 |
| 20. <sup>1</sup> H NMR spectrum (DMSO) of <b>19</b>  | S21 |
| 21. <sup>13</sup> C NMR spectrum (DMSO) of <b>19</b> | S22 |
| 22. ESI mass spectrum of of <b>19</b>                | S23 |
| 23. <sup>1</sup> H NMR spectrum (DMSO) of <b>22</b>  | S24 |
| 24. <sup>13</sup> C NMR spectrum (DMSO) of <b>22</b> | S25 |
| 25. ESI mass spectrum of of <b>22</b>                | S26 |
| 26. Purity criteria for tested compounds             | S27 |
| 27. Table 1SI                                        | S28 |
| 28. Table 2SI                                        | S29 |
| 29. Table 3SI                                        | S30 |
| 30. Figure 1SI                                       | S31 |
| 31. Figure 2SI                                       | S32 |
| 32. Figure 3SI                                       | S33 |

## Reagents and general experimental procedure

Commercial reagents: Sigma–Aldrich. Solvents: Carlo Erba. TLC: Silica Gel 60 F254 (plates 5 x 20, 0.25 mm) Merck. Preparative TLC: Silica Gel 60 F254 plates (20 x 20, 2 mm). Spots revealed by UV lamp then by spraying with 2 N sulfuric acid and heating at 120 °C. ‘Acidic’ silica gel was prepared by treating Silica Gel 60 Merck with 1 N HCl for 24 h, washing with water until the chlorine test was negative, activating for 48 h at 120 °C, then equilibrating with 10% of water. Anhydrous solvents: Sigma–Aldrich or prepared by distillation according to standard procedures. ESI mass spectra were performed on a hybrid quadrupole-TOF mass spectrometer, dissolving the sample in MeOH. The spectra were recorded by infusion into the ESI source using MeOH as the solvent. EI mass spectra were obtained on GC-MS HP 5890, HP 5971A Mass selective detector.  $^1\text{H}$  (700 MHz) and  $^{13}\text{C}$  (175 MHz) NMR spectra were recorded on a Varian INOVA spectrometer respectively; chemical shifts were referenced to the residual solvent signal ( $\text{CDCl}_3$ :  $\delta_{\text{H}}=7.26$ ,  $\delta_{\text{C}}=77.0$ ). For an accurate measurement of the coupling constants, the one-dimensional  $^1\text{H}$  NMR spectra were transformed at 64 K points (digital resolution: 0.09 Hz). Homonuclear ( $^1\text{H}$ -  $^1\text{H}$ ) and heteronuclear ( $^1\text{H}$ - $^{13}\text{C}$ ) connectivities were determined by COSY and HSQC experiments, respectively. Two and three bond  $^1\text{H}$ - $^{13}\text{C}$  connectivities were determined by gradient 2D HMBC experiments optimized for a  $^{2,3}J$  of 8 Hz. Routine  $^1\text{H}$  and  $^{13}\text{C}$  NMR spectra were recorded with a Varian Gemini 200 MHz or a Varian Mercury 300 MHz or a Bruker Avance 400 MHz. High performance liquid chromatography (HPLC) separations were achieved on a Knauer 501 apparatus equipped with an RI detector.

$^1\text{H}$  NMR in DMSO of 17

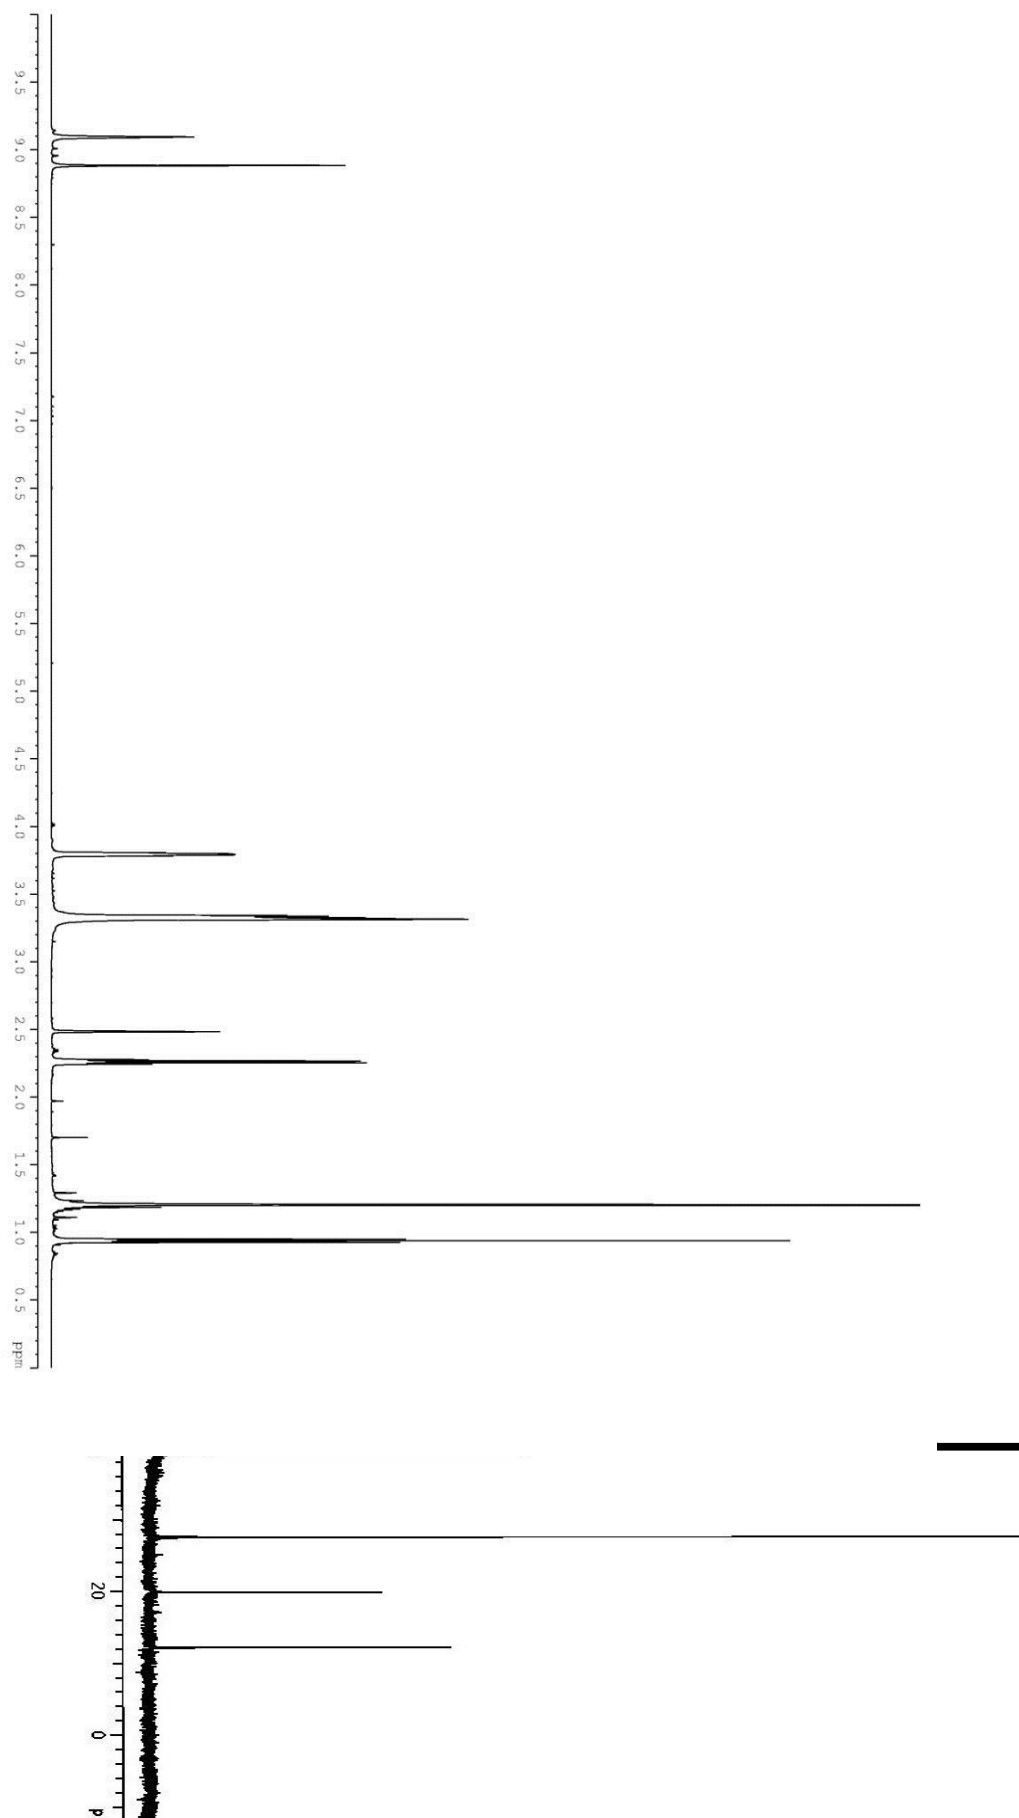

COSY in DMSO of 17

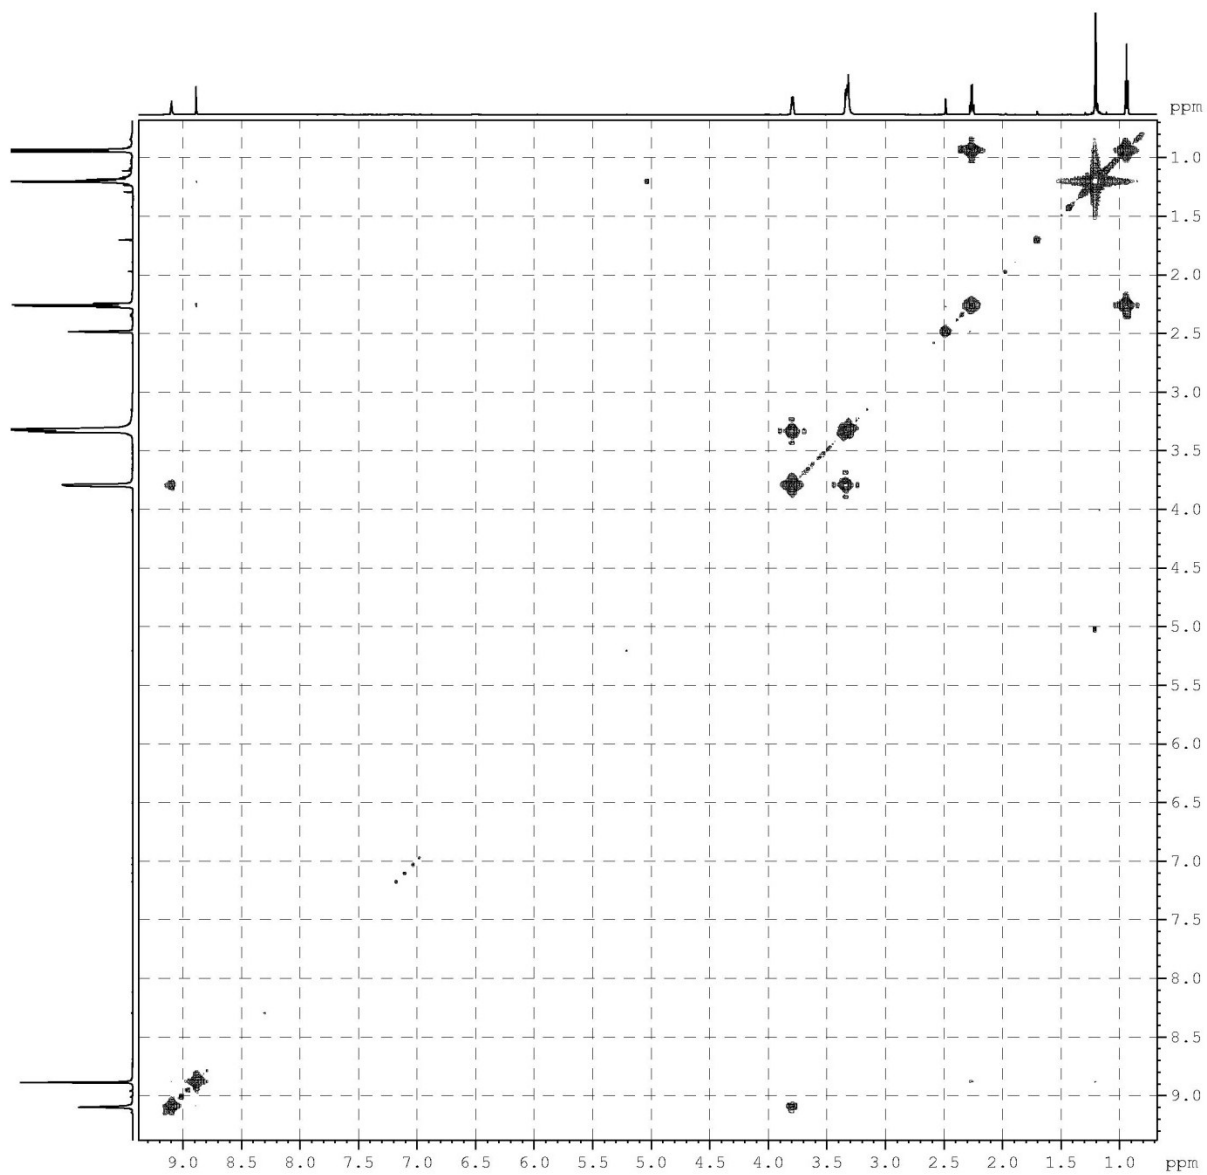

# HSQC in DMSO of 17

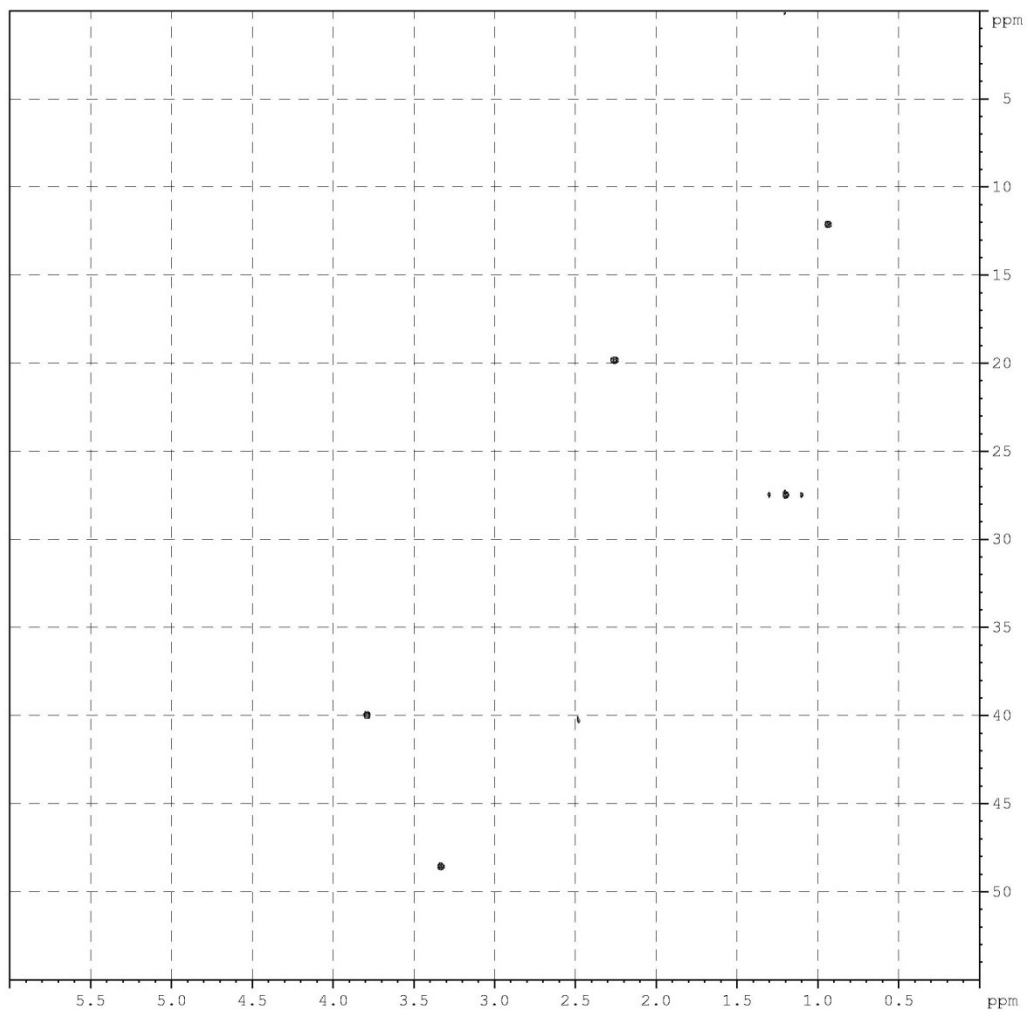

# HMBC in DMSO of 17

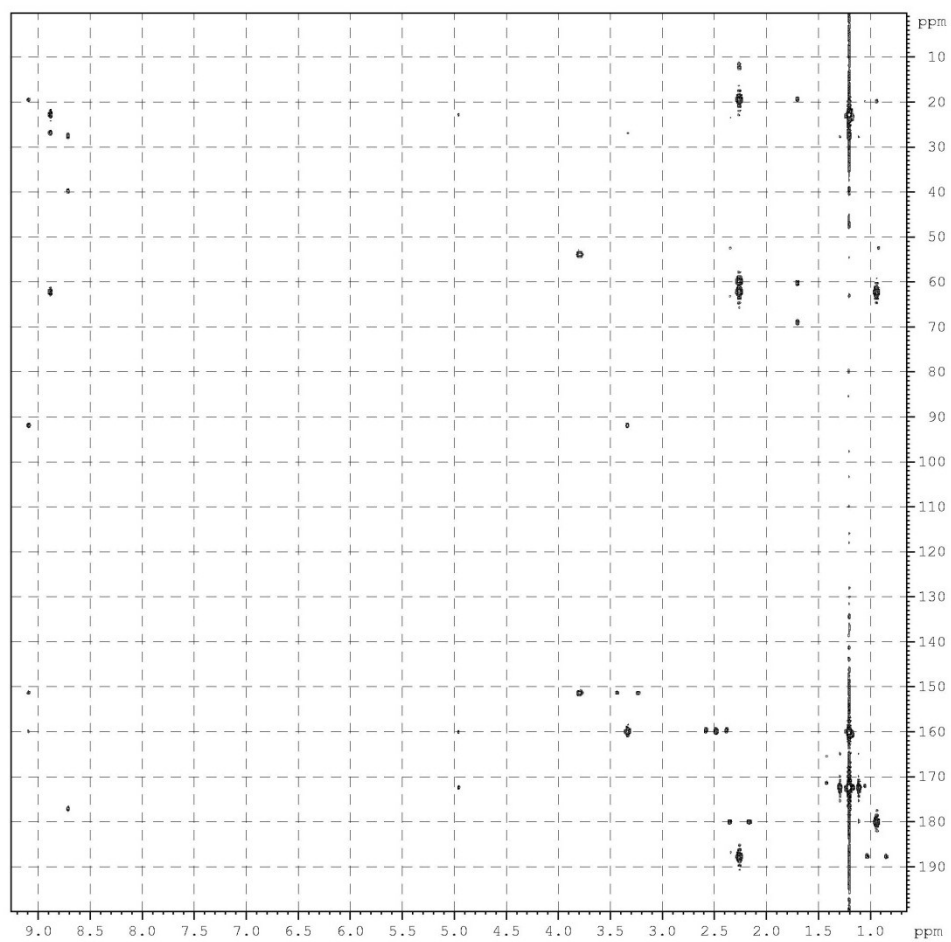

# ESI mass spectrum of 17

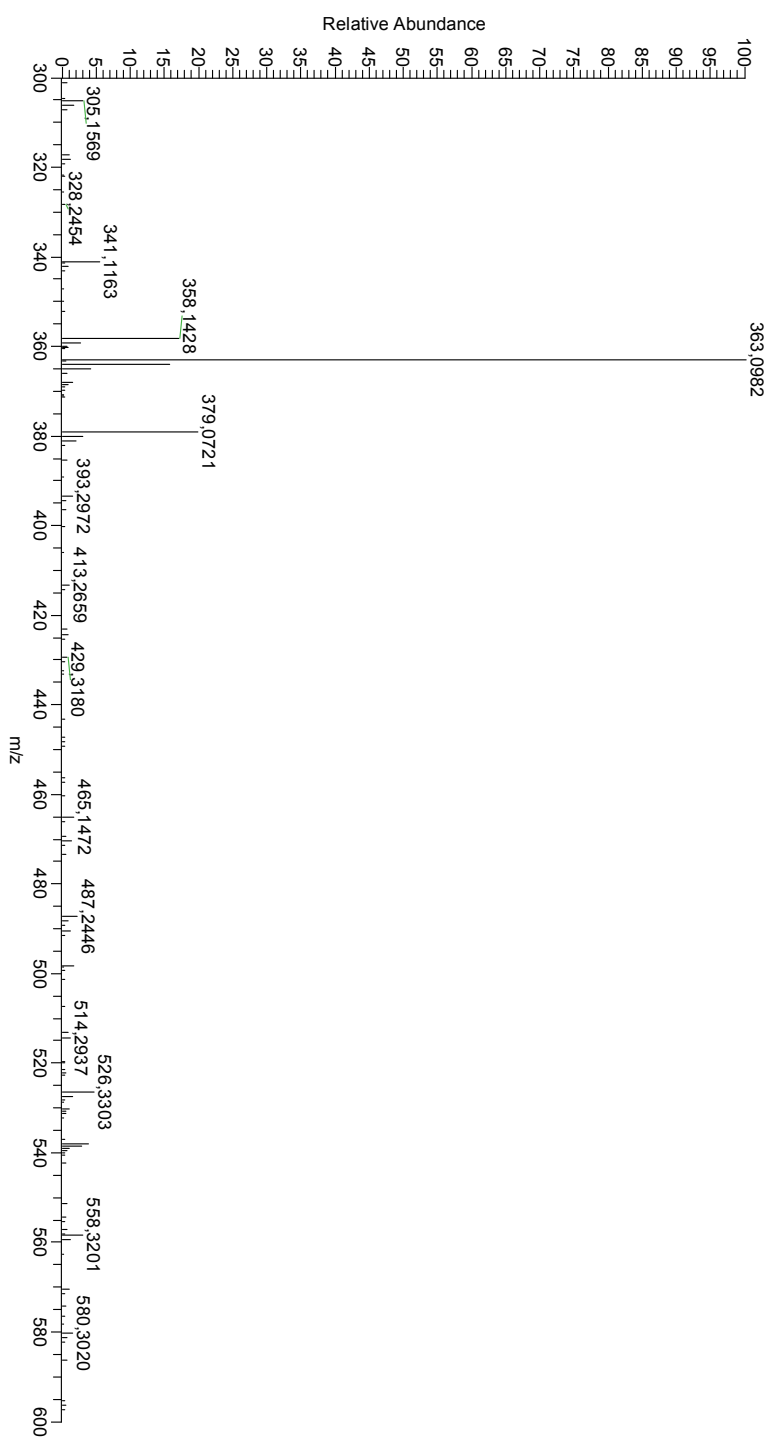

$^1\text{H}$  NMR in DMSO of **20**

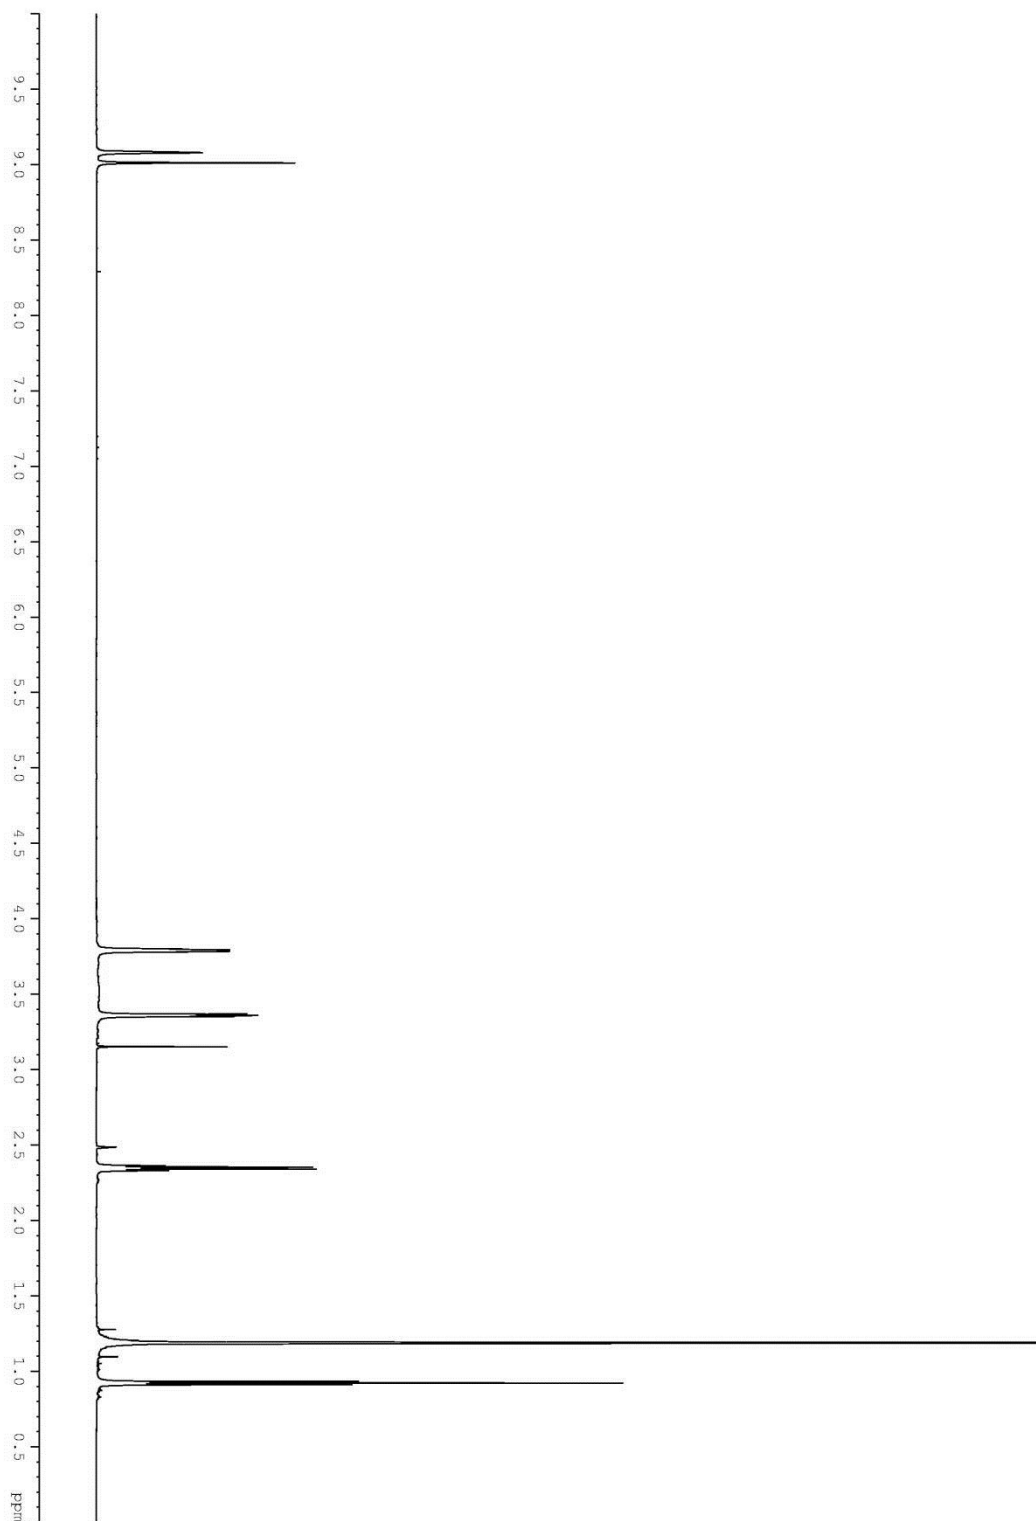



$^{13}\text{C}$  NMR in DMSO of **20**

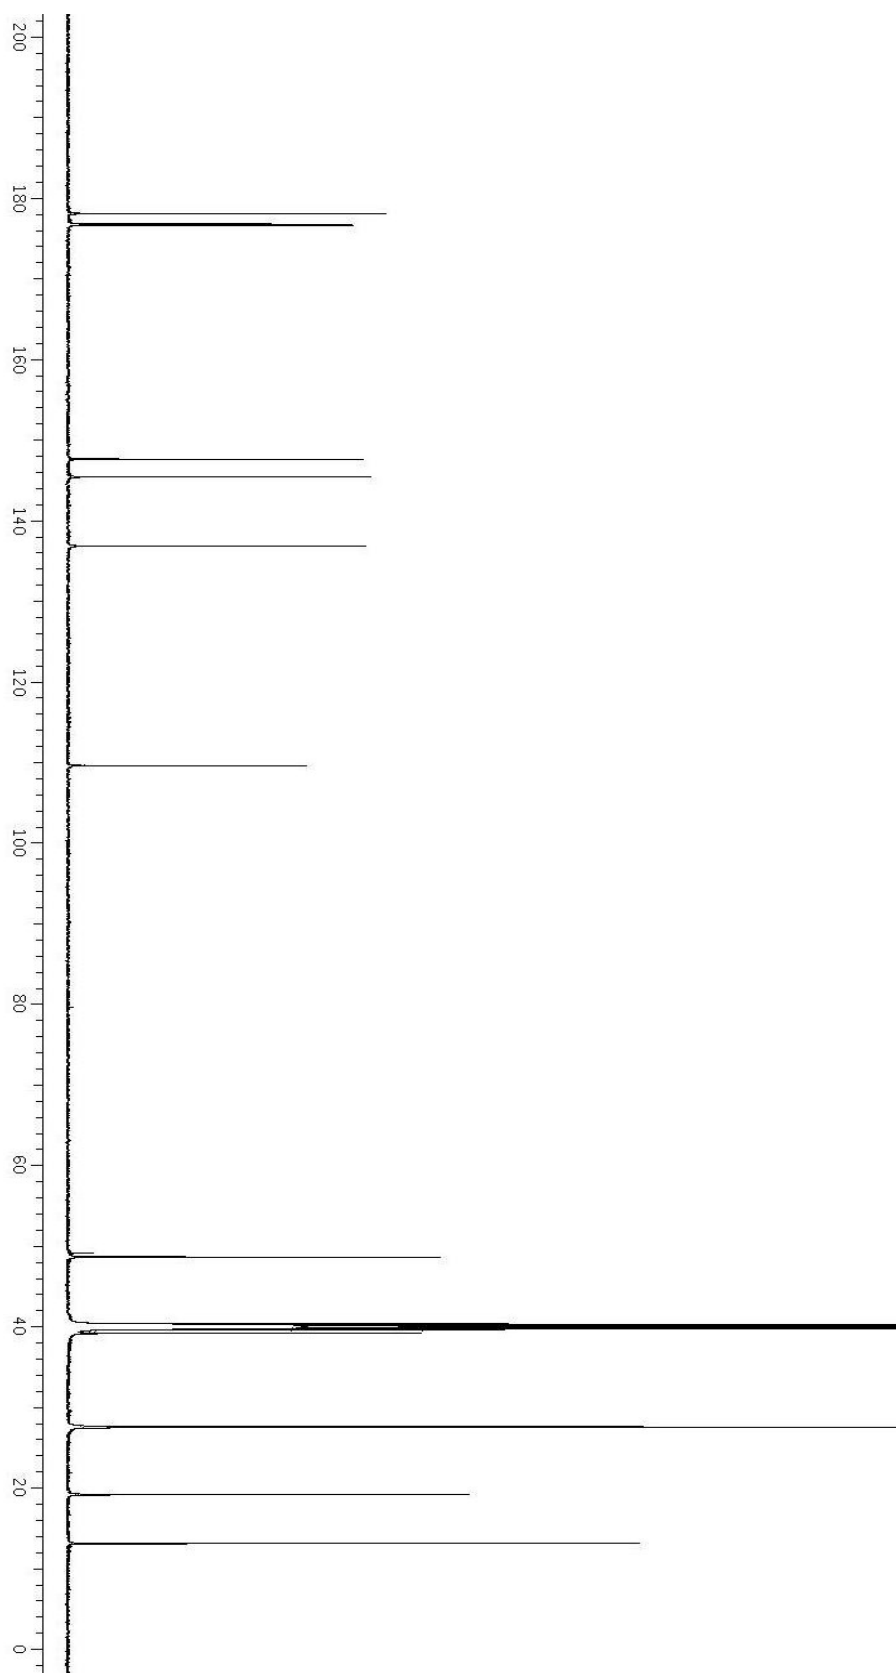

COSY in DMSO of 20

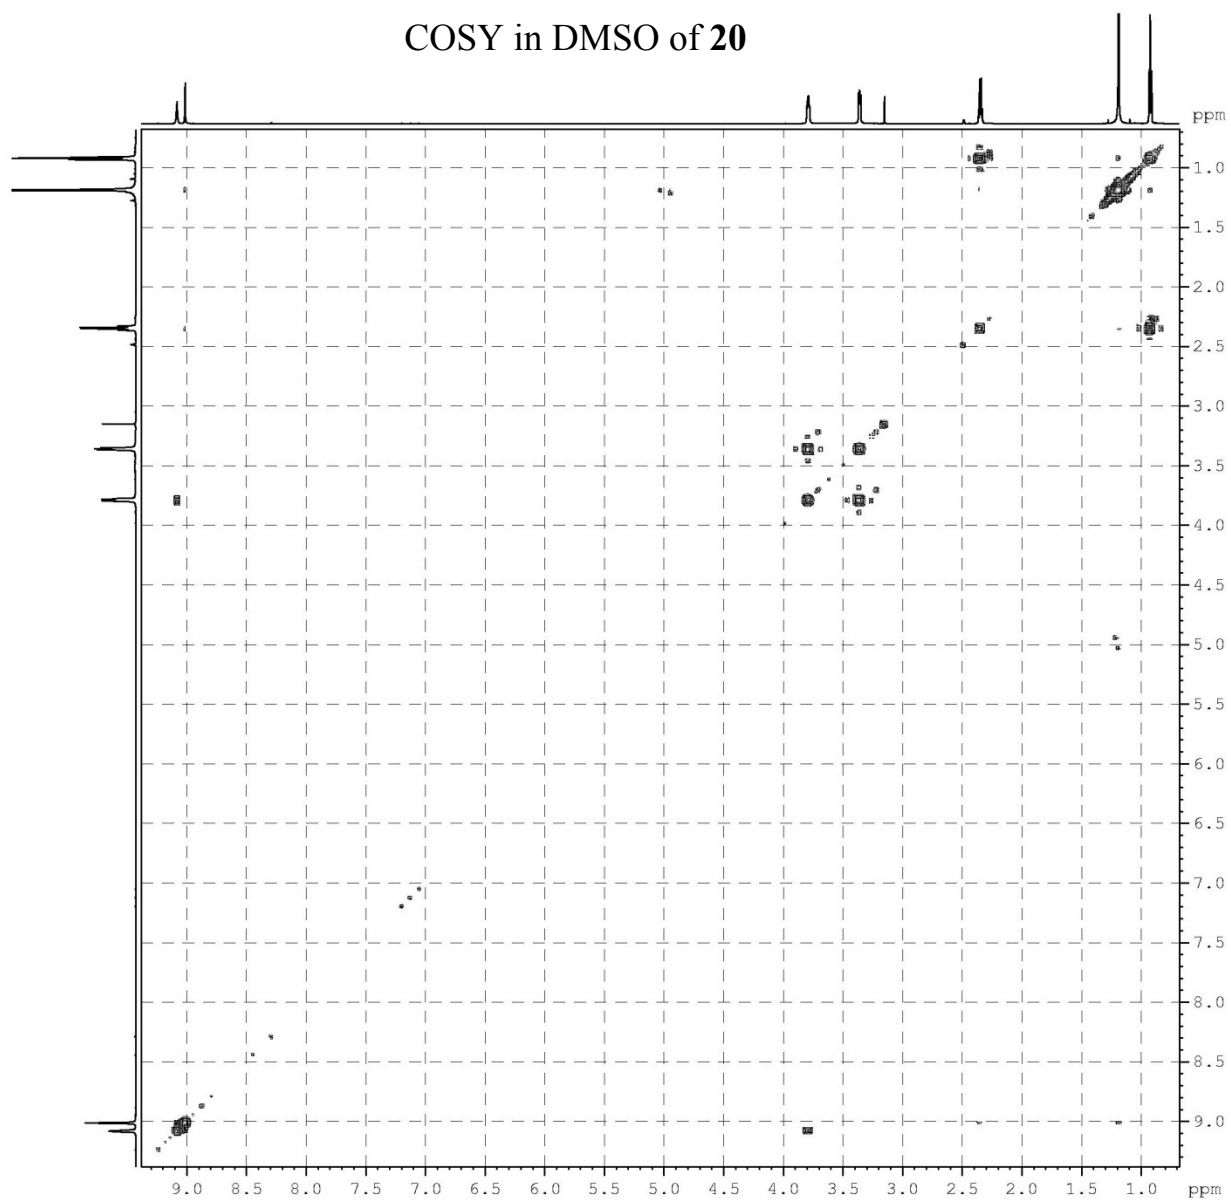

# HSQC in DMSO of **20**

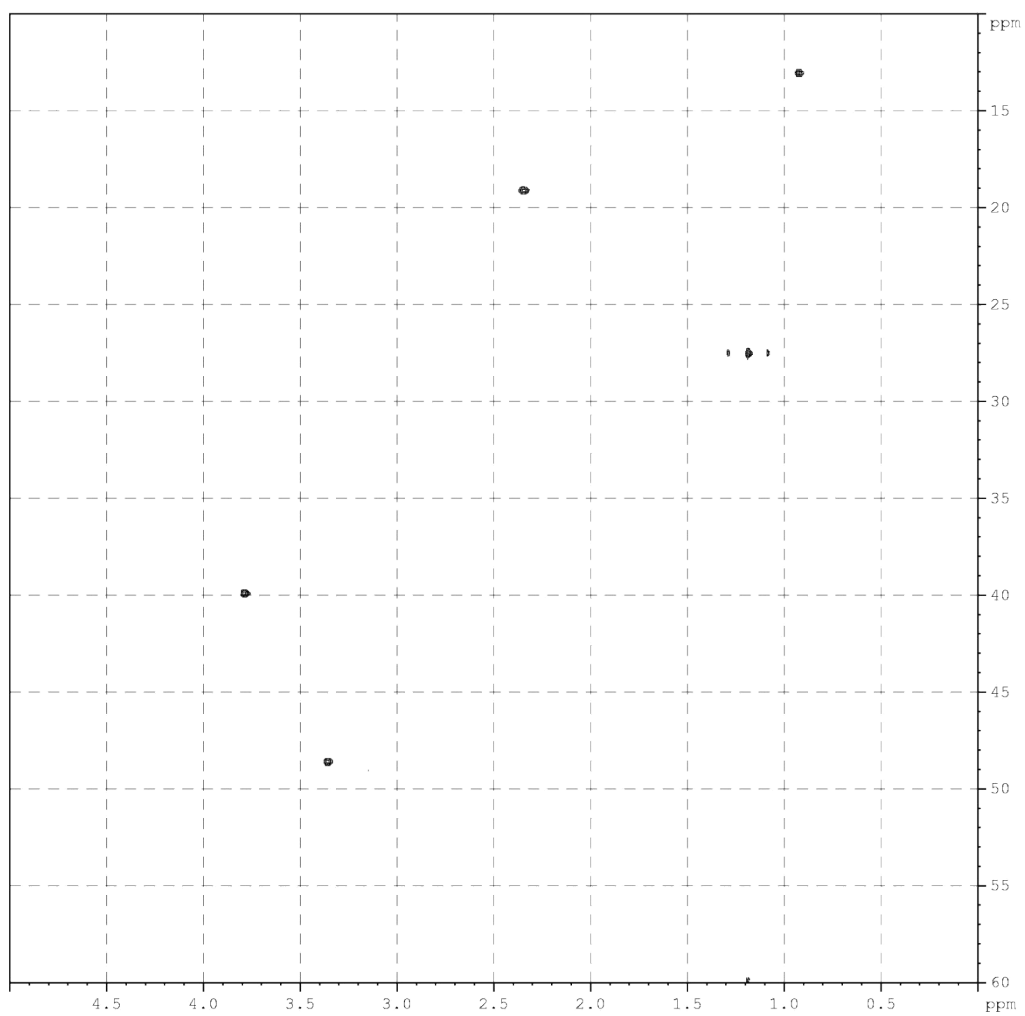

# HMBC in DMSO of 20

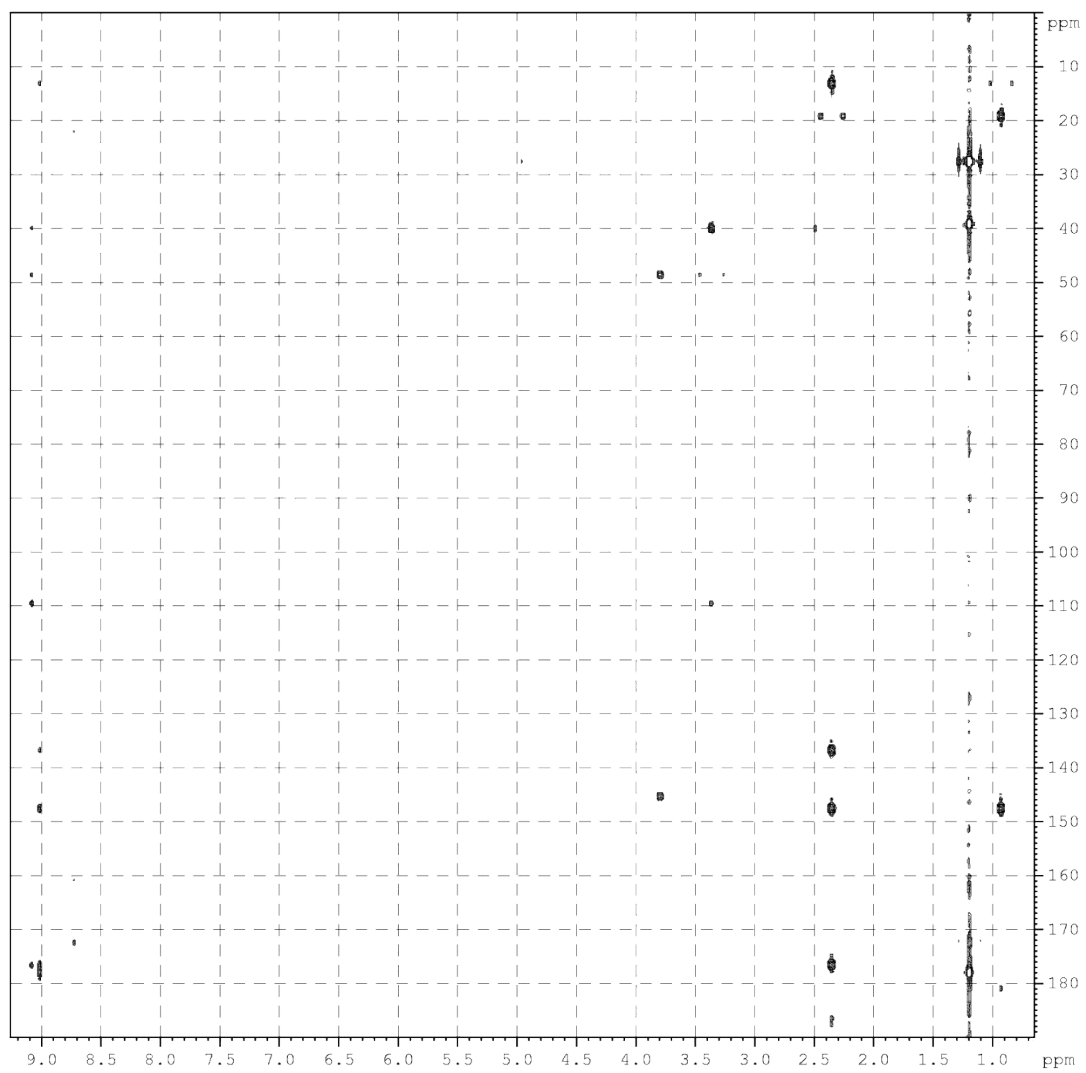

# ESI mass spectrum of **20**

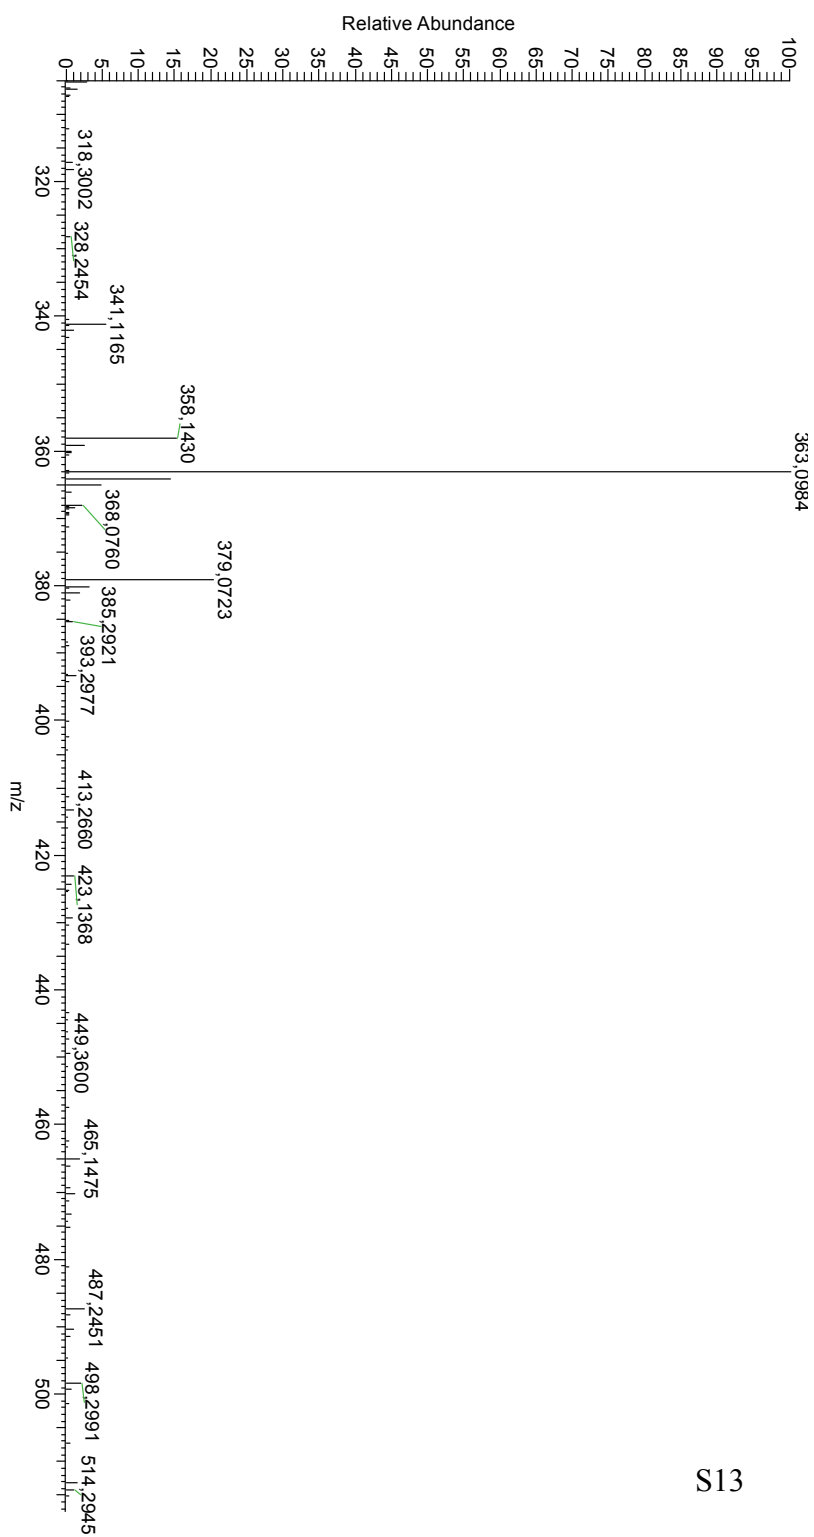

$^1\text{H}$  NMR in DMSO of **18**

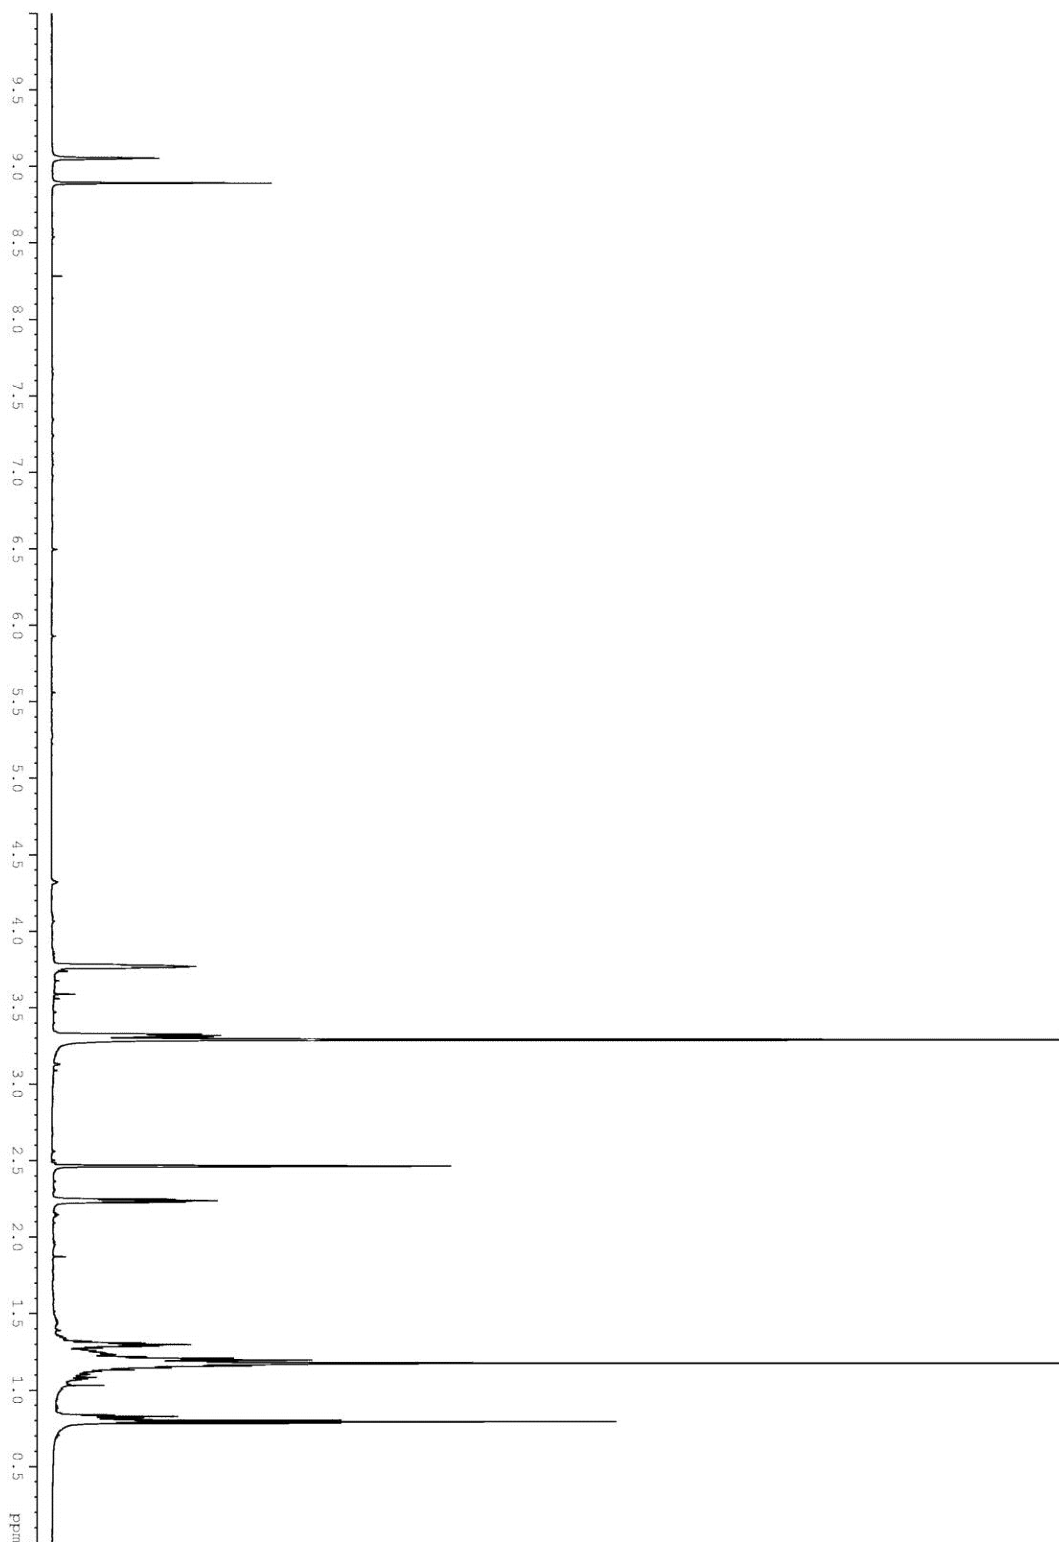

$^{13}\text{C}$  NMR in DMSO of **18**

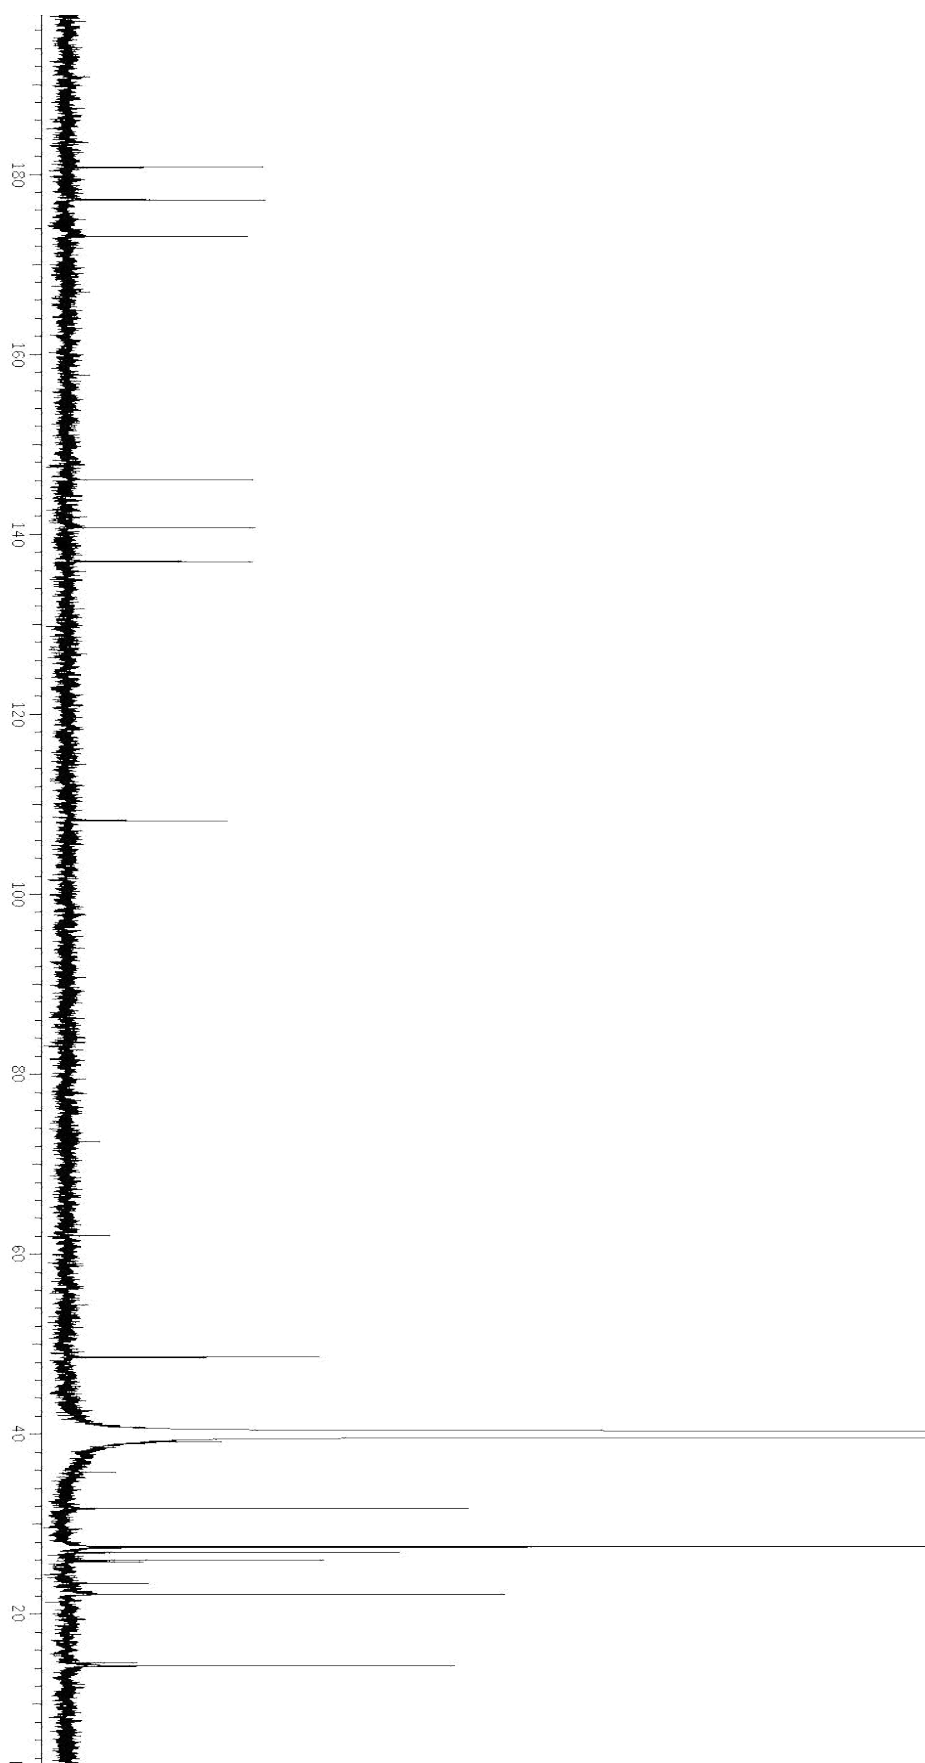

# ESI mass spectrum of 18

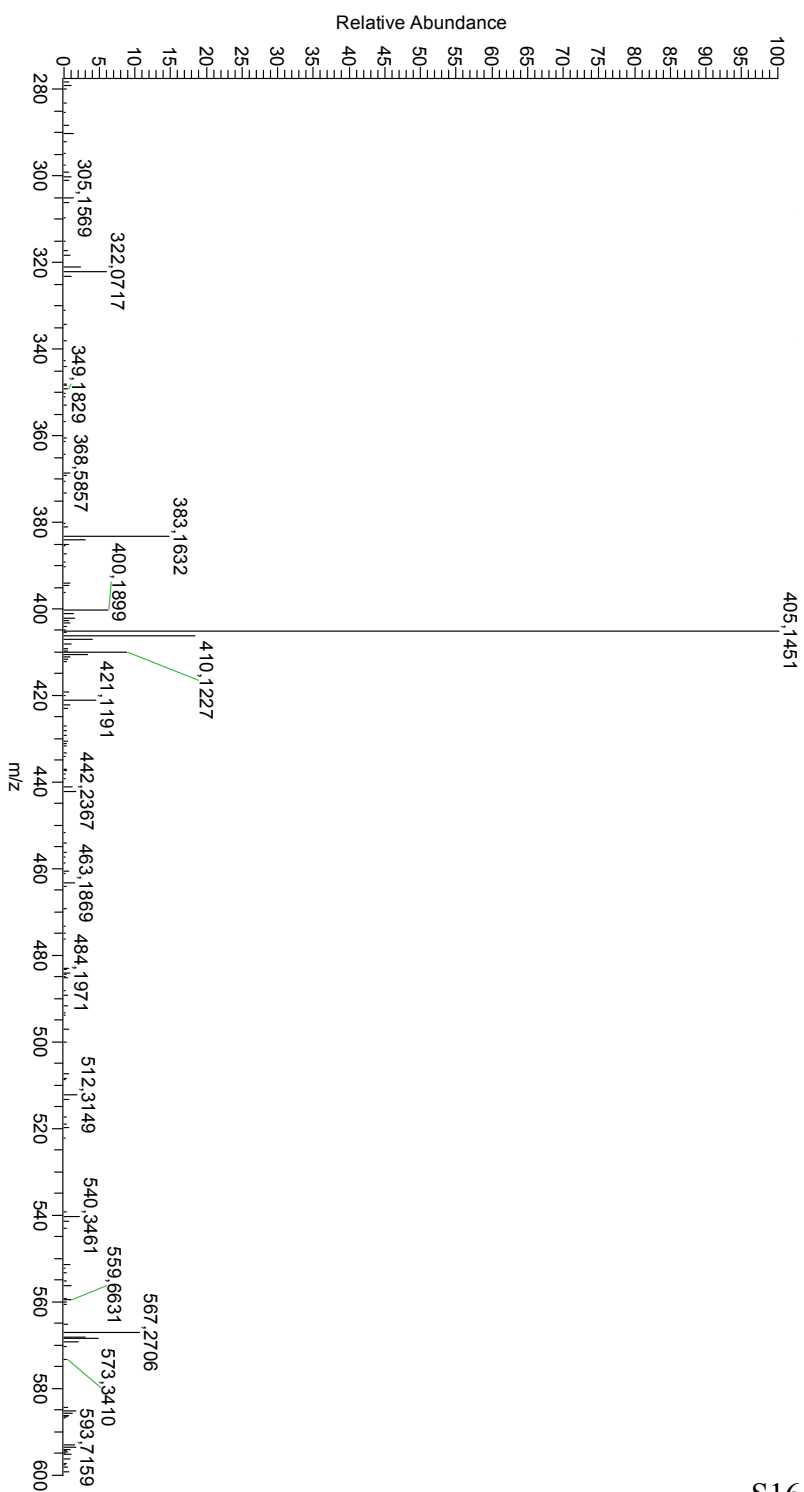



$^1\text{H}$  NMR in DMSO of **21**

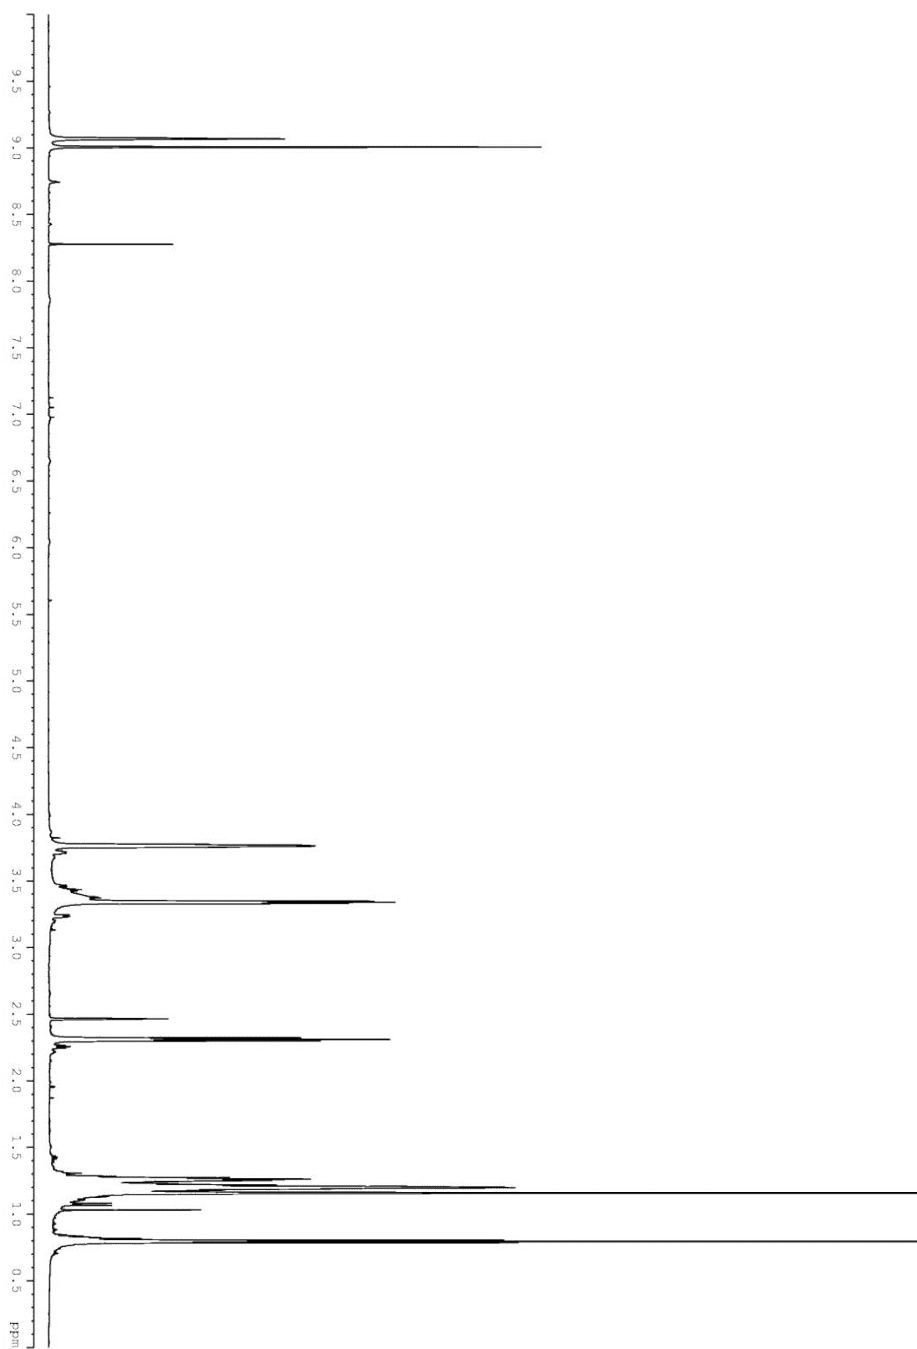

$^{13}\text{C}$  NMR in DMSO of **21**

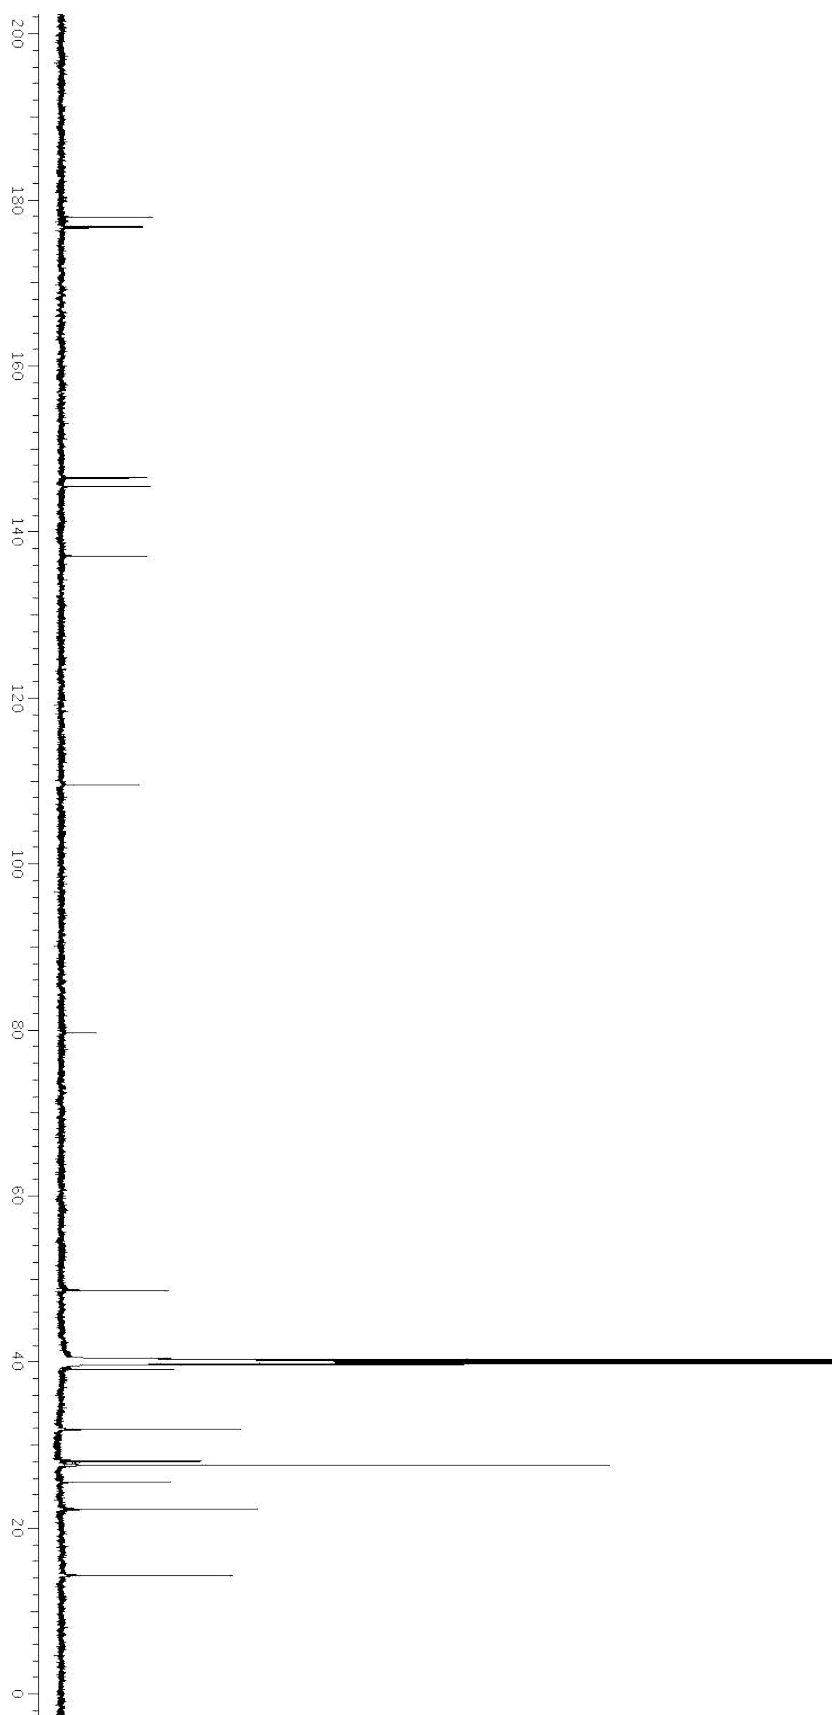

# ESI mass spectrum of 21

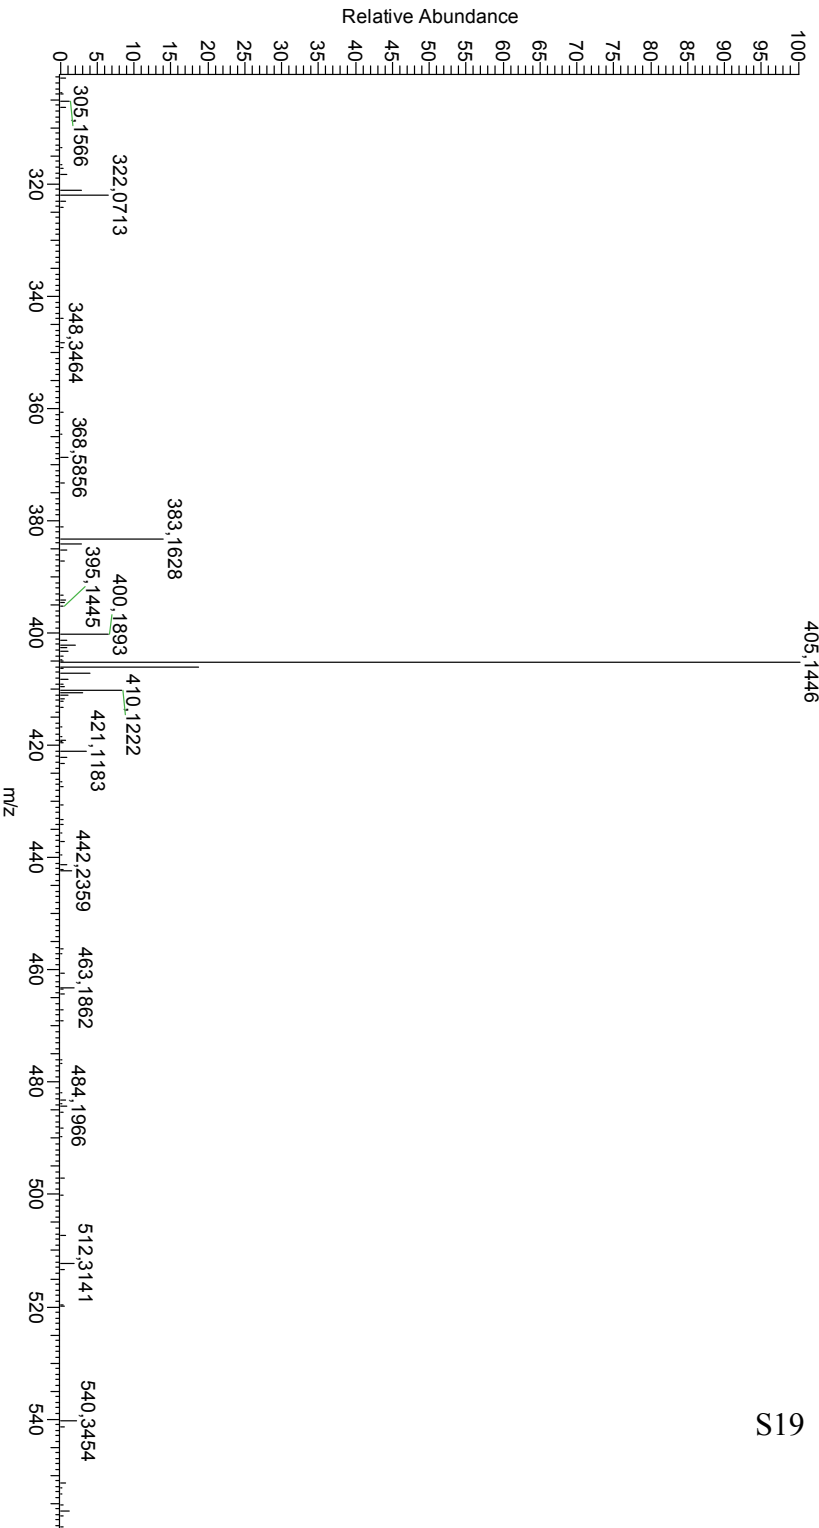

$^1\text{H}$  NMR in DMSO of **19**

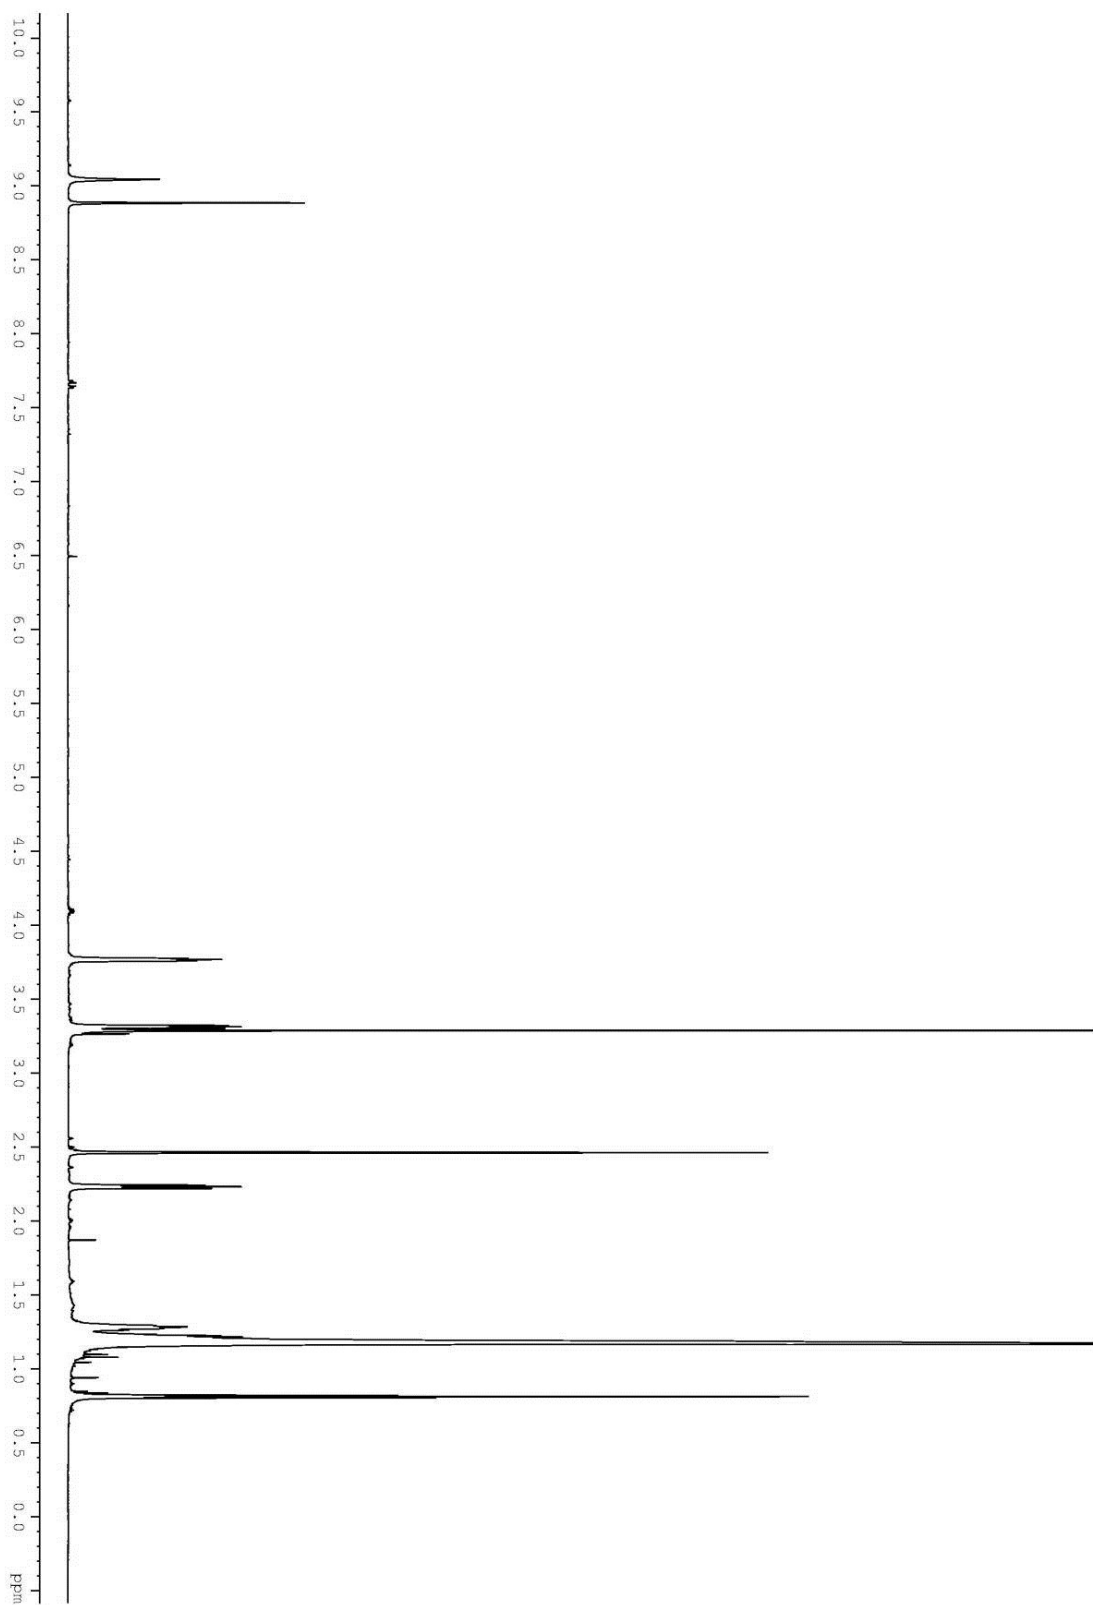

$^{13}\text{C}$  NMR in DMSO of **19**

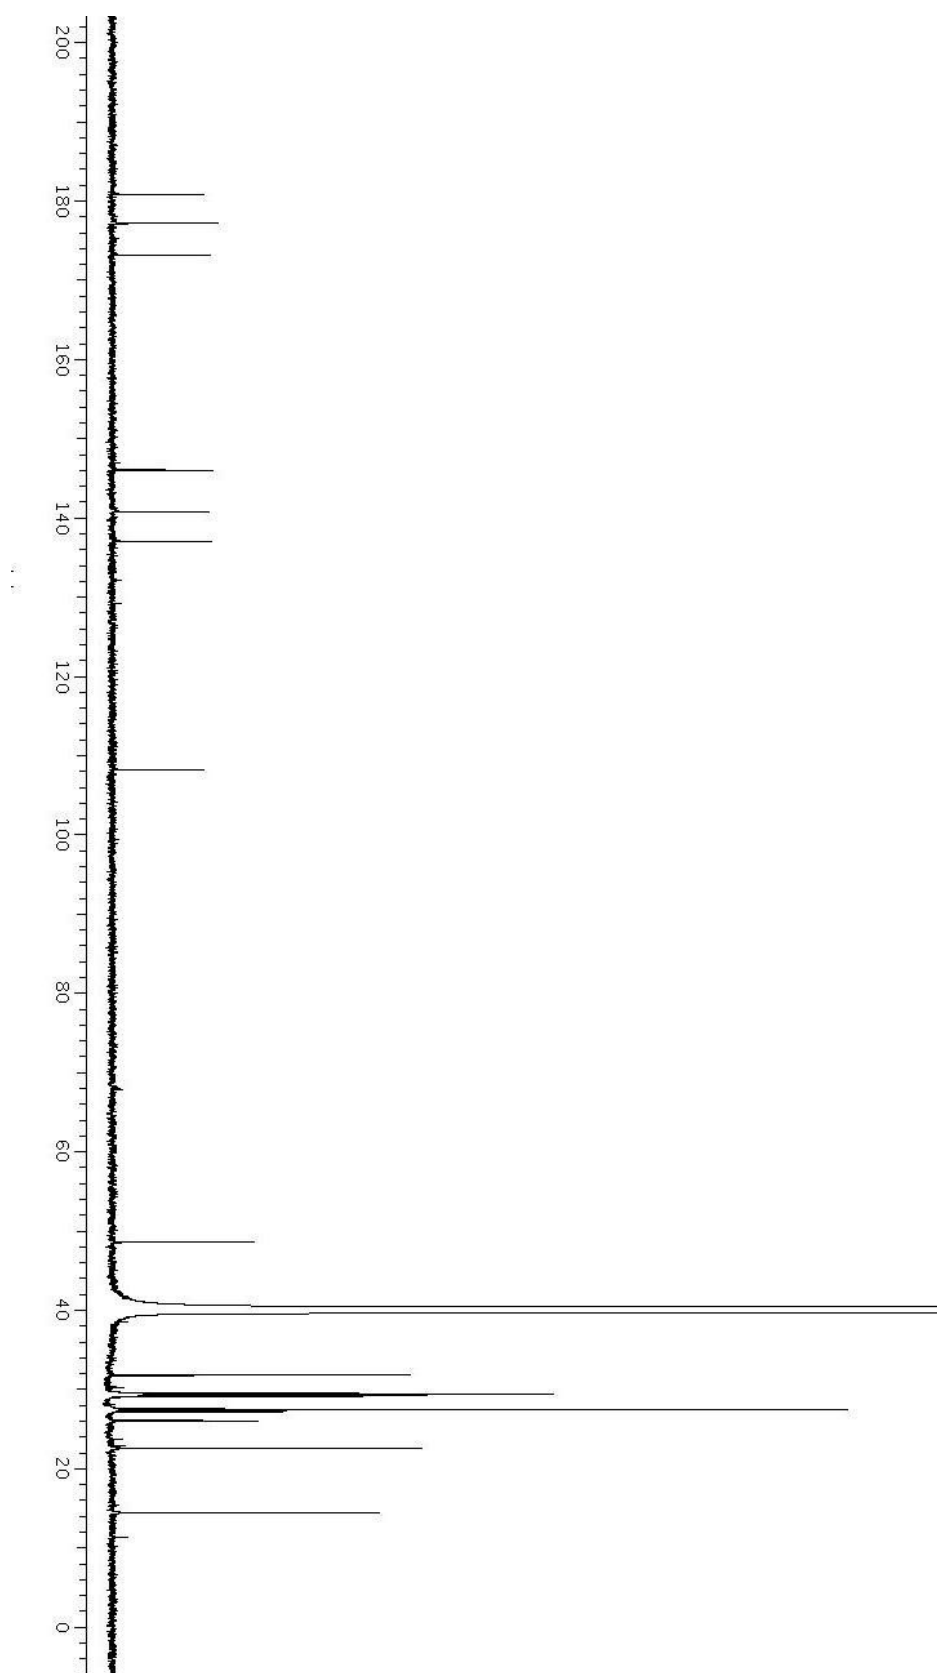

# ESI mass spectrum of 19

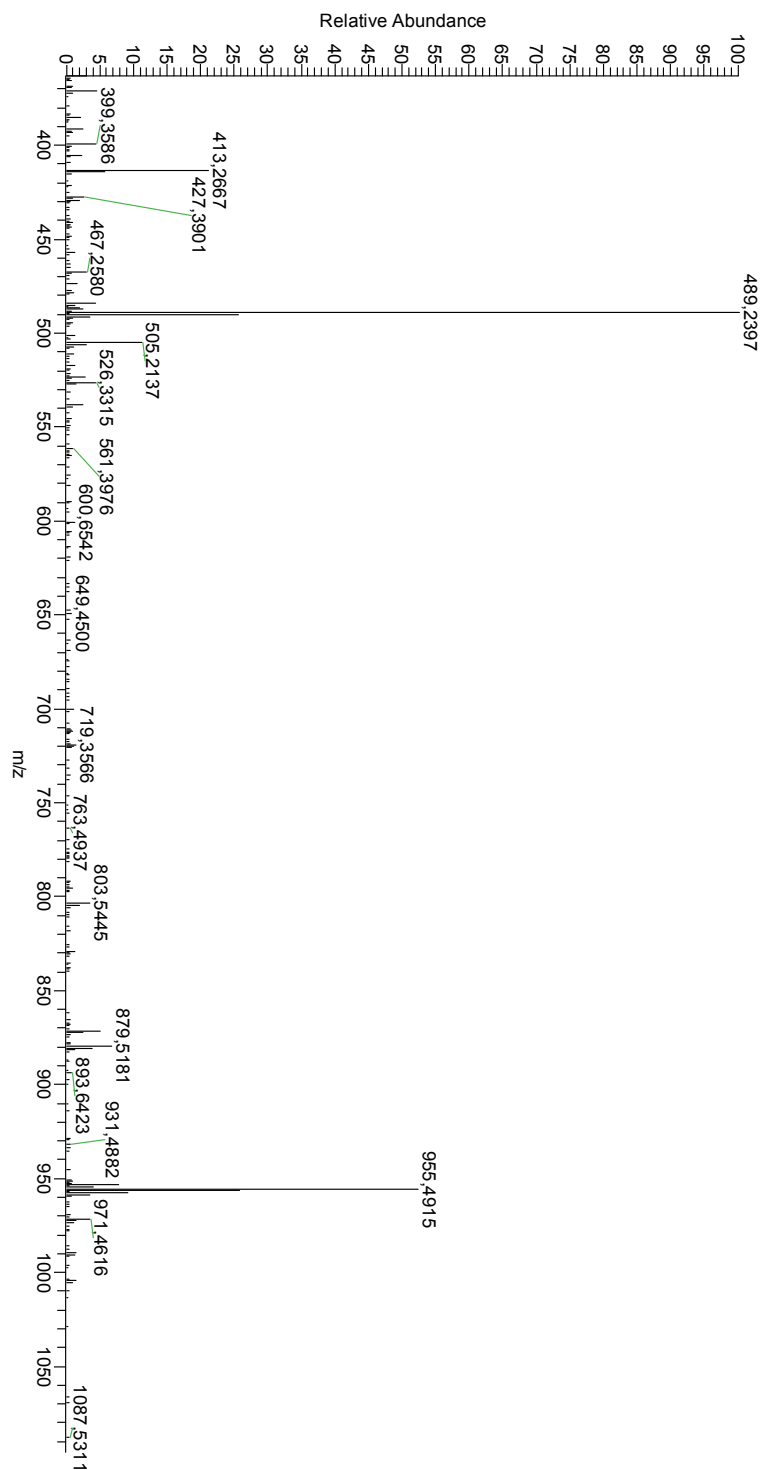

$^1\text{H}$  NMR in DMSO of **22**

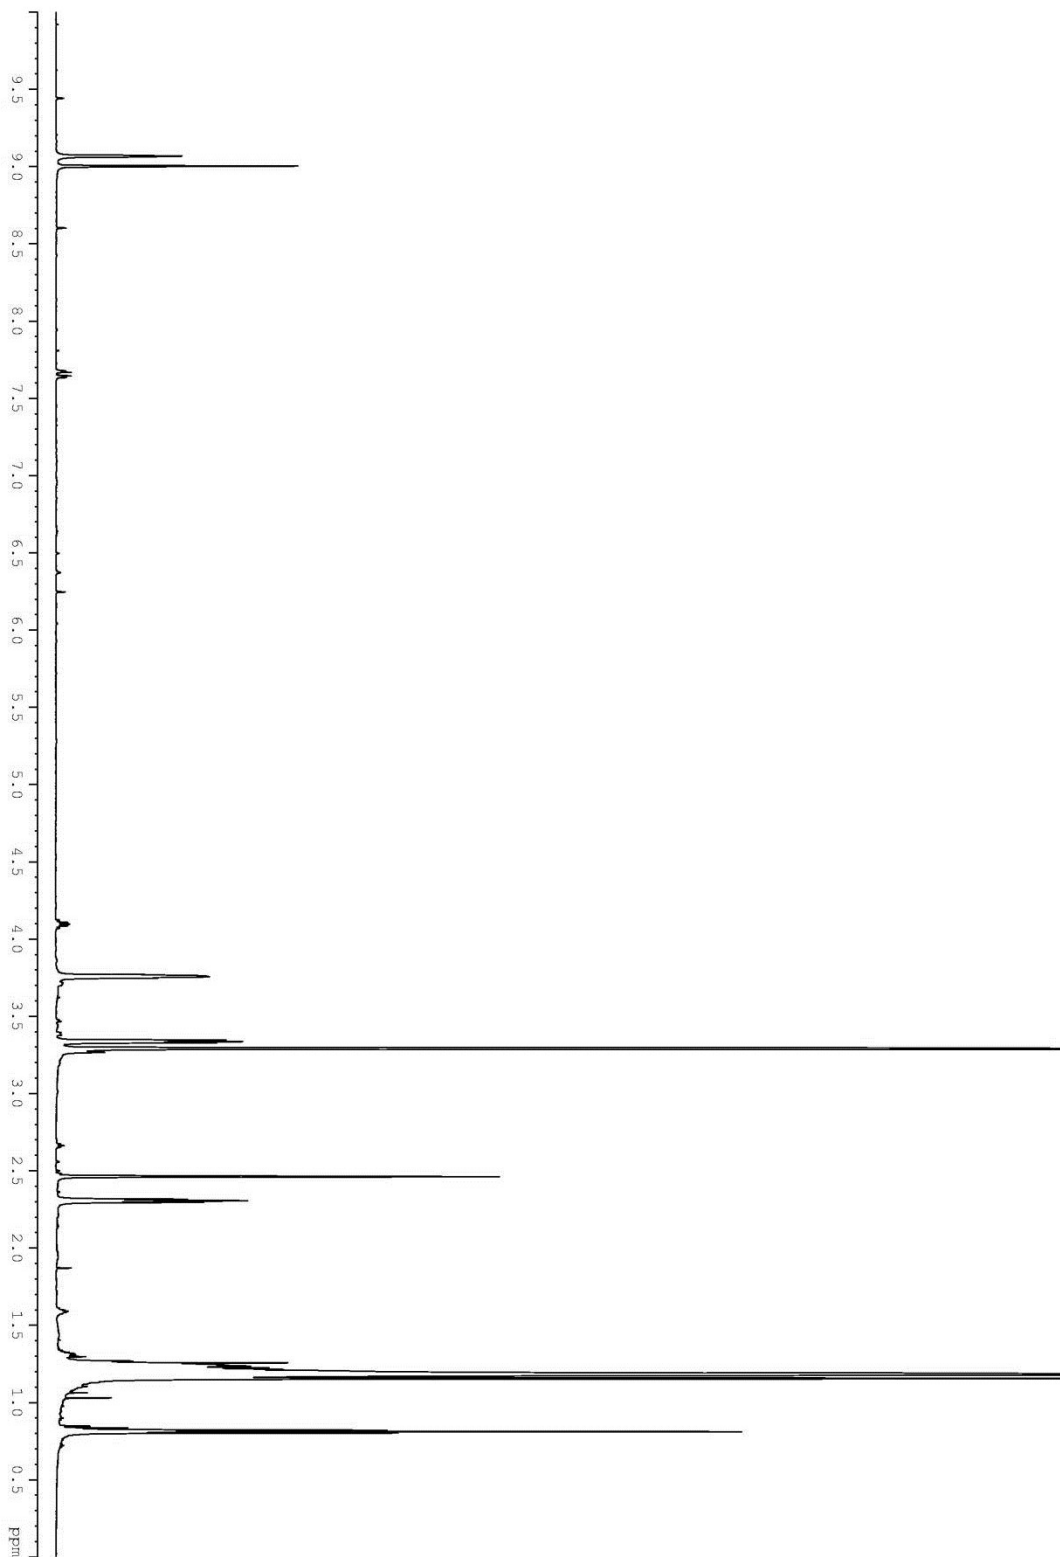

$^{13}\text{C}$  NMR in DMSO of **22**

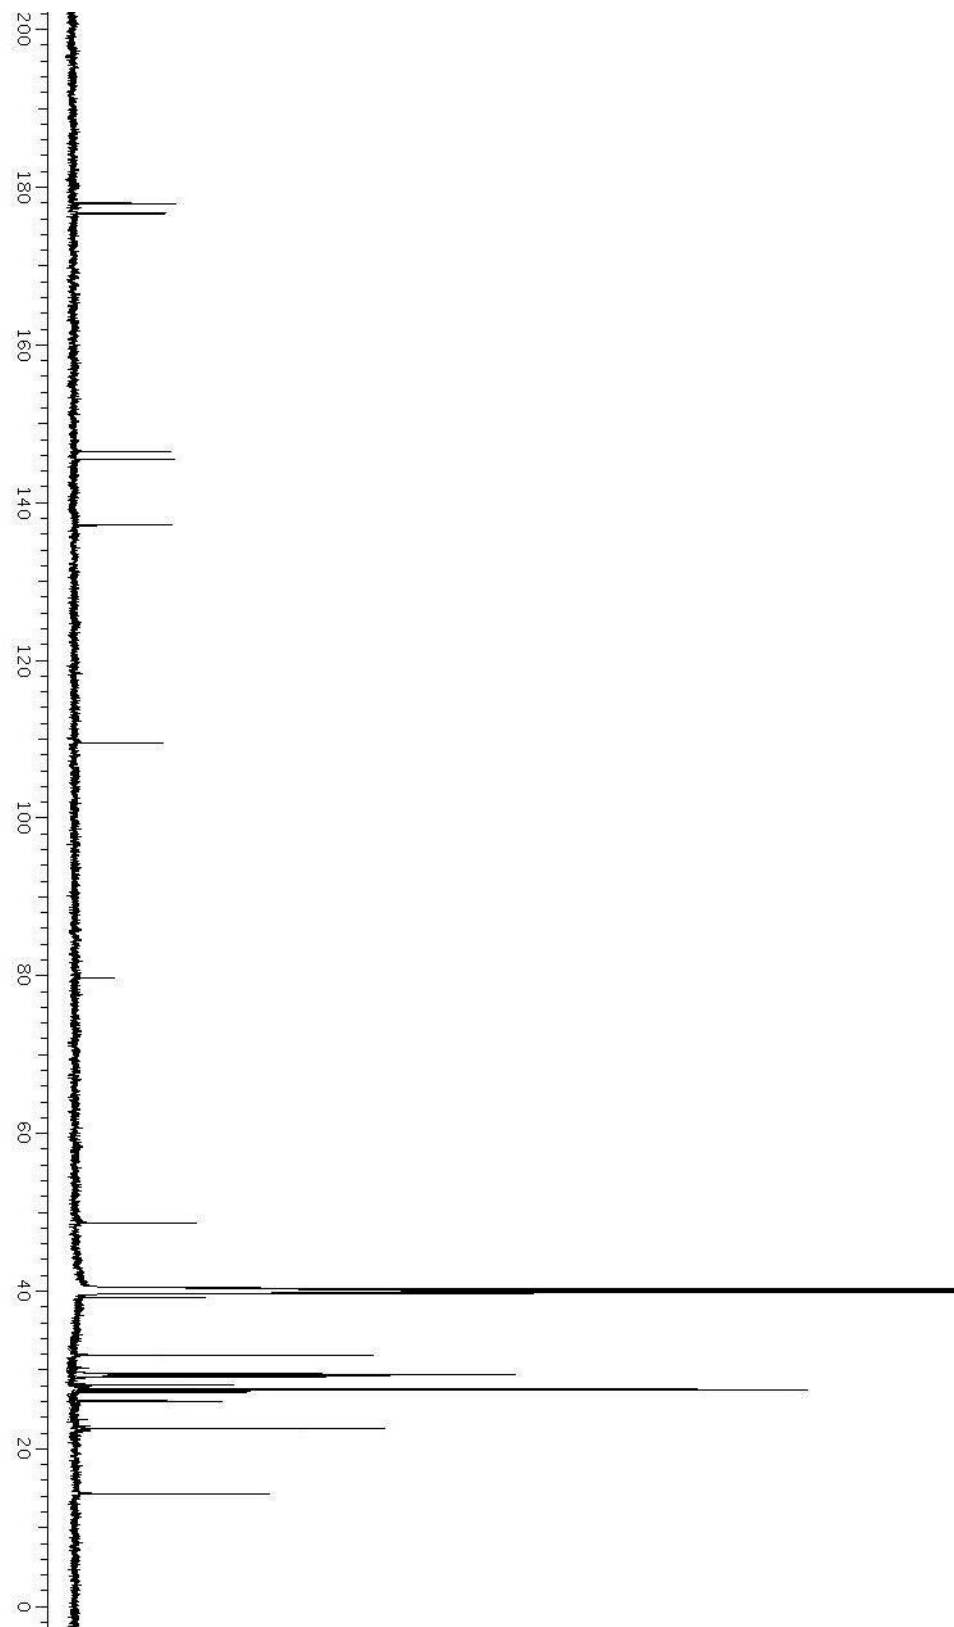



# ESI mass spectrum of 22

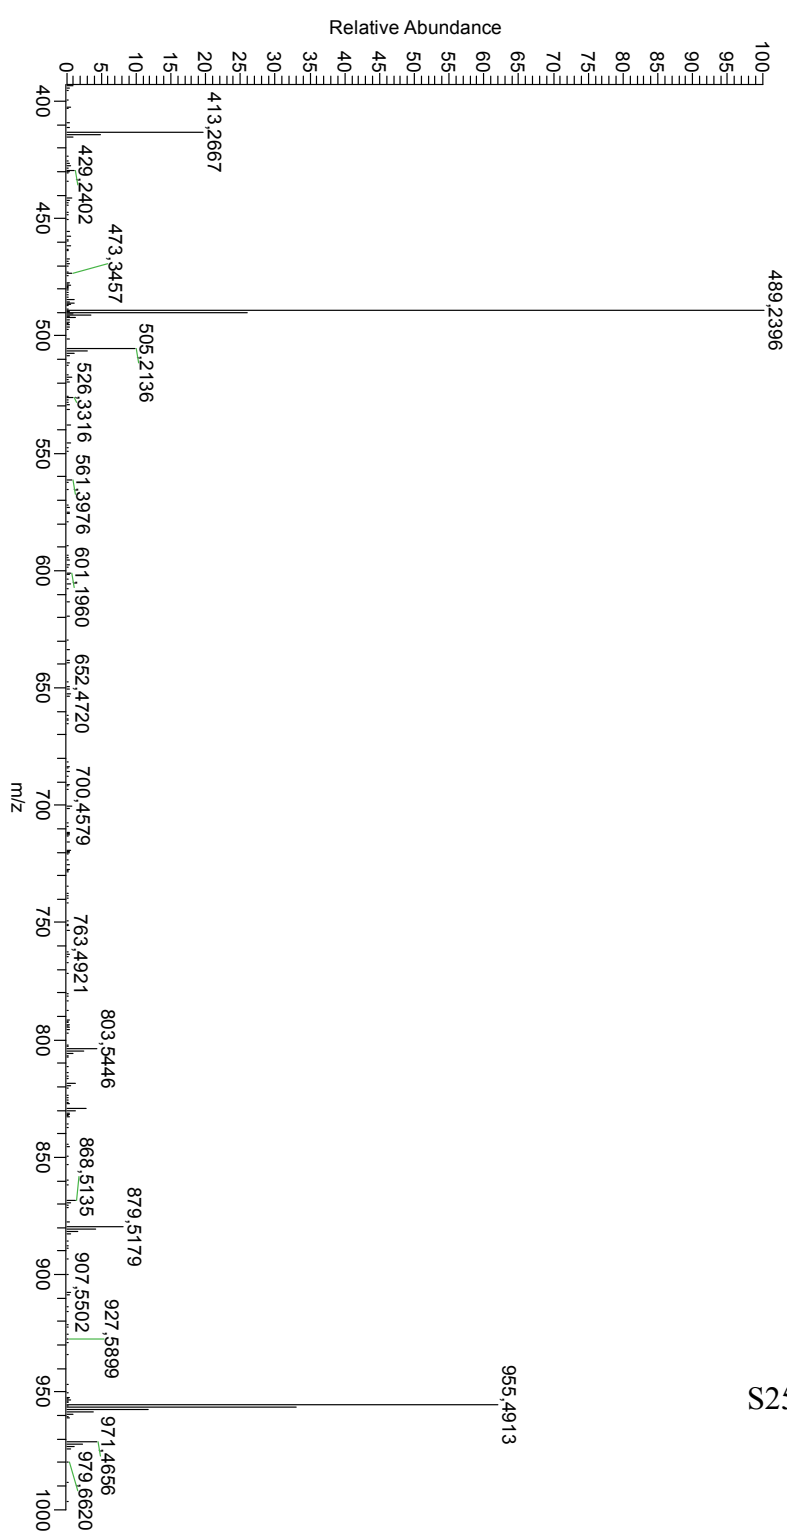

S25

### Purity criteria for tested compounds.

| Compounds | Purity <sup>a</sup> | t <sub>R</sub> <sup>b</sup> | Compounds | Purity <sup>a</sup> | t <sub>R</sub> <sup>b</sup> |
|-----------|---------------------|-----------------------------|-----------|---------------------|-----------------------------|
| <b>11</b> | 95.8%               | 13.9                        | <b>17</b> | 97.2%               | 9.1                         |
| <b>12</b> | 96.8%               | 13.1                        | <b>18</b> | 97.6%               | 7.4                         |
| <b>13</b> | 97.1%               | 12.1                        | <b>19</b> | 96.8%               | 5.7                         |
| <b>14</b> | 96.5%               | 23.7                        | <b>20</b> | 97.3%               | 22.3                        |
| <b>15</b> | 95.8%               | 24.3                        | <b>21</b> | 97.7%               | 18.3                        |
| <b>16</b> | 95.5%               | 21.1                        | <b>22</b> | 96.5%               | 14.5                        |

<sup>a</sup> The degree of purity of compounds **11-22** was measured by silica gel high performance liquid chromatography (HPLC). The chromatography data were obtained on a SiO<sub>2</sub> column (Luna 3 μm, 150 x 4.60 mm) eluting with EtOAc/hexane 6:4 (v/v) the compounds **11-16** (flow rate of 1 mL/min) and eluting with EtOAc/hexane 7:3 (v/v) the compounds **17-22** (flow rate of 1 mL/min).

<sup>b</sup> Retention times (t<sub>R</sub>) are expressed in minutes

**Table 1. NMR data of compounds 18/21, 19/22.**

| Pos.       | 18         |                                 | 21         |                                 | 19         |                                 | 22         |                                 |
|------------|------------|---------------------------------|------------|---------------------------------|------------|---------------------------------|------------|---------------------------------|
|            | $\delta_C$ | $\delta_H$ , mult.<br>(J in Hz) |
| <b>1</b>   | -          | -                               | -          | -                               | -          | -                               | -          | -                               |
| <b>2</b>   | 48.8       | 3.34 m                          | 48.6       | 3.33 m                          | 48.8       | 3.34 m                          | 48.7       | 3.33 m                          |
| <b>3</b>   | 40.0       | 3.80 m                          | 39.9       | 3.76 m                          | 40.0       | 3.80 m                          | 39.5       | 3.76 m                          |
| <b>4</b>   | -          | 9.05, brs                       | -          | 9.06, brs                       | -          | 9.05, brs                       | -          | 9.06, brs                       |
| <b>4a</b>  | 146.1      | -                               | 145.7      | -                               | 145.0      | -                               | 144.5      | -                               |
| <b>5</b>   | 180.6      | -                               | 176.7      | -                               | 179.8      | -                               | 175.7      | -                               |
| <b>6</b>   | 137.9      | -                               | 137.1      | -                               | 136.0      | -                               | 136.1      | -                               |
| <b>7</b>   | 140.7      | -                               | 148.1      | -                               | 139.7      | -                               | 145.5      | -                               |
| <b>8</b>   | 173.1      | -                               | 176.6      | -                               | 172.1      | -                               | 175.6      | -                               |
| <b>8a</b>  | 108.4      | -                               | 109.6      | -                               | 107.2      | -                               | 108.5      | -                               |
| <b>1'</b>  | 26.0       | 2.24, t (7.5)                   | 25.5       | 2.31, t (7.5)                   | 26.0       | 2.24, t (7.5)                   | 25.5       | 2.31, t (7.5)                   |
| <b>2'</b>  | 26.8       | 1.30                            | 28.0       | 1.28                            | 27.1       | 1.30                            | 27.9       | 1.30                            |
| <b>3'</b>  | 31.7       | 1.20                            | 31.8       | 1.20                            | 29.0       | 1.20                            | 29.0       | 1.20                            |
| <b>4'</b>  | 22.2       | 1.19                            | 22.1       | 1.19                            | 29.2       | 1.19                            | 29.2       | 1.19                            |
| <b>5'</b>  | 14.2       | 0.80, t (7.5)                   | 14.2       | 0.80, t (7.5)                   | 29.3       | 1.19                            | 29.3       | 1.19                            |
| <b>6'</b>  | -          | -                               | -          | -                               | 29.4       | 1.19                            | 29.4       | 1.19                            |
| <b>7'</b>  | -          | -                               | -          | -                               | 31.7       | 1.19                            | 31.8       | 1.19                            |
| <b>9'</b>  | -          | -                               | -          | -                               | 22.5       | 1.20                            | 22.3       | 1.20                            |
| <b>10'</b> | -          | -                               | -          | -                               | 14.4       | 0.81, t (7.5)                   | 14.3       | 0.81, t (7.5)                   |
| <b>1''</b> | 177.2      | -                               | 177.9      | -                               | 177.1      | -                               | 177.9      | -                               |
| <b>2''</b> | 39.1       | -                               | 39.0       | -                               | 39.1       | -                               | 39.0       | -                               |
| <b>Me</b>  | 27.4       | 1.22                            | 27.3       | 1.22                            | 27.4       | 1.21                            | 27.3       | 1.21                            |
| <b>NH</b>  | -          | 8.90, brs                       | -          | 9.00, brs                       | -          | 8.88, brs                       | -          | 9.00, brs                       |

**Table 2SI.** Prevalent ionic forms of new thiazinoquinones.

| <b>Compounds</b> | <b>Prevalent ionic form (%)<sup>a</sup></b> |               |
|------------------|---------------------------------------------|---------------|
|                  | <b>pH 7.2</b>                               | <b>pH 5.5</b> |
| <b>12</b>        | N(100)                                      | N(100)        |
| <b>15</b>        | N(100)                                      | N(100)        |
| <b>19</b>        | N(100)                                      | N(100)        |
| <b>22</b>        | N(100)                                      | N(100)        |

<sup>a</sup>Percentage of ionic form in brackets; N = neutral form.

**Table 3SI.** Inhibition of BH formation by chloroquine and test compounds

| <b>Compounds</b> | Hemin/<br>compound ratios | <b>% inhibition BH formation*</b> |       |       |       |       |       |
|------------------|---------------------------|-----------------------------------|-------|-------|-------|-------|-------|
|                  |                           | 1:0.5                             | 1:1   | 1:2   | 1:4   | 1:8   | 1:16  |
| <b>17</b>        |                           | 0                                 | 1.01  | 1.78  | 3.57  | 14.6  | 19.15 |
| <b>20</b>        |                           | 0                                 | 0     | 1.04  | 8.91  | 13.68 | 25.31 |
| <b>22</b>        |                           | 0                                 | 0     | 1.12  | 7.47  | 12.15 |       |
| <b>CQ</b>        |                           | 0                                 | 44.11 | 89.46 | 80.02 | 90.83 |       |

\*The data are the mean of the results from two experiments in duplicate

**A**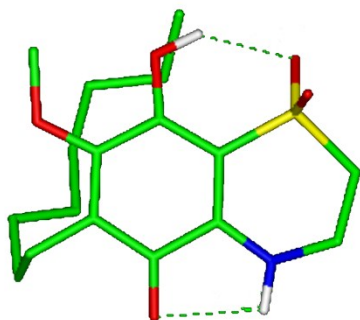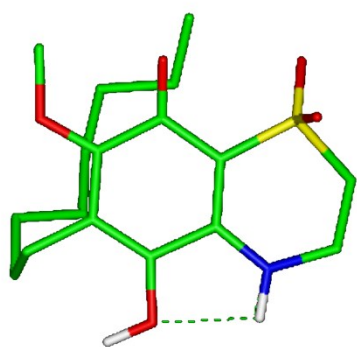**B**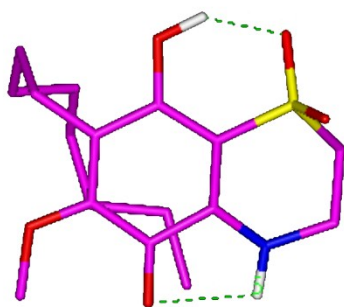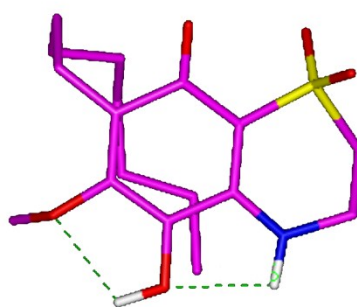

**Figure 1SI.**  $\text{QH}^{\bullet}_i$  (top) and  $\text{QH}^{\bullet}_{ii}$  (bottom) species of **12** GM (green; A) and **15** GM (magenta; B). The ligands are colored by atom type (O = red, N = blue, S = yellow and H = white). Hydrogen bonds are highlighted by green dashed lines. Hydrogens are omitted for the sake of clarity with the exception of those involved in hydrogen bonds.

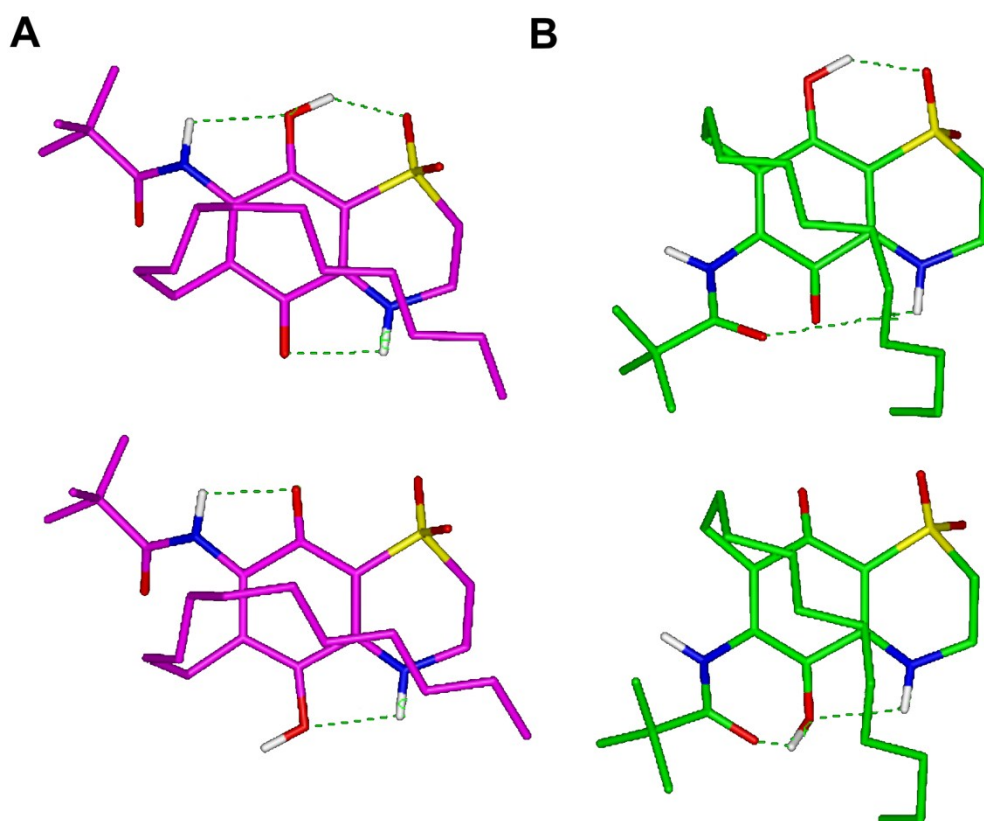

**Figure 2SI.**  $\text{QH}^{\bullet}_i$  (top) and  $\text{QH}^{\bullet}_{ii}$  (bottom) species of 19 GM (magenta; A) and 22 GM (green; B). The ligands are colored by atom type (O = red, N = blue, S = yellow and H = white). Hydrogen bonds are highlighted by green dashed lines. Hydrogens are omitted for the sake of clarity with the exception of those involved in hydrogen bonds.

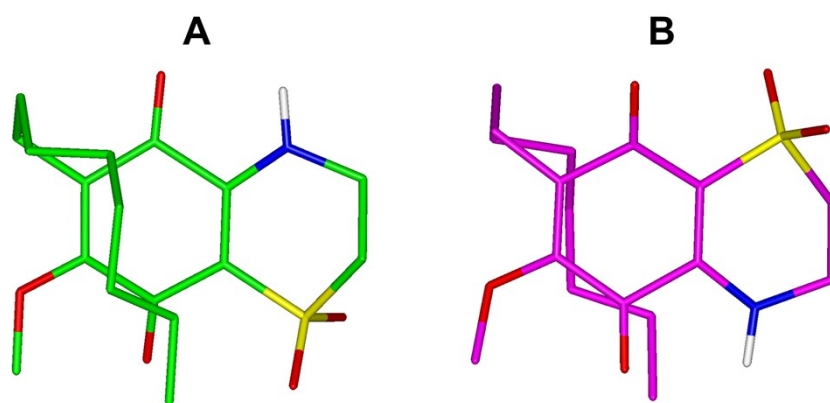

**Figure 3SI.** PM7 GM conformer of **12** (green; A); PM7 GM conformer of **15** (magenta; B). The ligands are colored by atom type (O = red, N = blue, S = yellow and H = white). Hydrogens are omitted for the sake of clarity with the exception of those of amine function.
